# Supplementary material
Source: PubMed Central journal article supplement (PMC3378381)
Supplement: NIHMS335188-supplement-1.pdf [file NIHMS335188-supplement-1.pdf]

## Supplementary Information

### **Deep resequencing of GWAS loci identifies independent rare variants associated with inflammatory bowel disease**

Manuel A. Rivas, Melissa Beaudoin, Agnes Gardet, Christine Stevens, Yashoda Sharma, Clarence K. Zhang, Gabrielle Boucher, Stephan Ripke, Noel Burt, Tim Fennell, Andrew Kirby, Anna Latiano, Philippe Goyette, Todd Green, Jonas Halfvarson, Talin Haritunians, Joshua M. Korn, Finny Kuruvilla, Caroline Lagacé, Benjamin Neale, Ken Sin Lo, Phil Schumm, Mark Silverberg, Leif Törkvist, David Ellinghaus, NIDDK IBD Genetics Consortium<sup>¶</sup>, International Inflammatory Bowel Disease Genetics Consortium<sup>¶</sup>, Marla Dubinsky, Steven R. Brant, Richard H. Duerr, David Altshuler, Stacey Gabriel, Guillaume Lettre, Andre Franke, Mauro D'Amato, Dermot P.B. McGovern, Judy H. Cho, John D. Rioux, Ramnik J. Xavier, Mark J. Daly

## Table of Contents

|                                                                                                                                                    |           |
|----------------------------------------------------------------------------------------------------------------------------------------------------|-----------|
| <b>Supplementary Note</b> .....                                                                                                                    | <b>3</b>  |
| <b>Section S1. Study design</b> .....                                                                                                              | <b>3</b>  |
| <b>Section S2. DNA preparation and pooling</b> .....                                                                                               | <b>3</b>  |
| <b>Section S3. Target selection and design</b> .....                                                                                               | <b>4</b>  |
| <b>Section S4. Discovery via Sequencing</b> .....                                                                                                  | <b>5</b>  |
| Rare variant discovery with Syzygy.....                                                                                                            | 5         |
| <b>Section S5. Validation</b> .....                                                                                                                | <b>6</b>  |
| <b>Section S6. Follow-up Genotyping</b> .....                                                                                                      | <b>7</b>  |
| Grouping of samples .....                                                                                                                          | 10        |
| <b>Supplementary Tables</b> .....                                                                                                                  | <b>11</b> |
| Supplementary Table 1. List of sequenced CD candidate genes listed with GWAS associated SNP. ....                                                  | 11        |
| Supplementary Table 2. Primers designed for CD pooled sequencing experiment. ....                                                                  | 12        |
| Supplementary Table 3. List of 115 nonsynonymous, nonsense, splice-site variants selected for follow-up typing in large case control samples. .... | 34        |
| Supplementary Table 4. Identification of independent rare risk and protective variants associated with IBD.....                                    | 38        |
| Supplementary Table 5. Conditional analysis of NOD2 variants.....                                                                                  | 39        |
| Supplementary Table 6. Conditional analysis for rare variants in IL18RAP and MUC19. ....                                                           | 39        |
| Supplementary Table 7. Additive genetic variance explained.....                                                                                    | 40        |
| <b>Supplementary Figures</b> .....                                                                                                                 | <b>41</b> |
| Supplementary Figure 1. Coverage summary and power to detect variants. ....                                                                        | 41        |
| Supplementary Figure 2. Pooled sequence allele frequency and genotyped allele frequency correlation. ....                                          | 43        |
| Supplementary Figure 3. Allele frequency distribution and study-wide power.....                                                                    | 44        |
| Supplementary Figure 4. CARD9 reference protein and predicted splicing.....                                                                        | 47        |
| Supplementary Figure 5. Shared extended haplotypes of Ashkenazi Jews with <i>NOD2</i> <i>p.N852S</i> and <i>p.M863V</i> mutation.....              | 48        |
| Supplementary Figure 6. LD structure of associated rare variants and common associated GWAS variant. ....                                          | 49        |
| Supplementary Figure 7. Null simulations for M.A.R.V. ....                                                                                         | 50        |
| <b>Consortium Authors</b> .....                                                                                                                    | <b>52</b> |

## **Supplementary Note**

### **Section S1. Study design**

In order to test the role of rare coding variants in CD GWAS regions to IBD we sequenced 350 patients with CD and 350 healthy controls of European Ancestry in a pooled fashion for a total of 107.5 kb of target sequence. We identified all nonsynonymous, nonsense, or splice site variants which occurred in 2 or more copies up to a frequency of 5% - a total of 115 variants. Excluding known GWAS associated low-frequency coding variants at NOD2, IL23R, and LRRK2/MUC19 follow-up genotyping was performed for 70 of these markers in nine independent case-control sample collections totaling 16054 CD disease patients, 12153 UC disease patients, and 17575 healthy controls. Given these numbers, we estimated the power to detect association at varying odds ratios and minor allele frequencies with an estimated prevalence of 4/1000 consistent with the additive genetic variance estimates of Franke *et al.* (2010). We report that of the 70 markers successfully genotyped 22%,60%,79%,88%,91% have at least 80% power to detect association at minor allele frequency odds ratios of 1.5,2,3,4, and 5 respectively and the required number of samples to achieve at least 80% power to detect nominal and experiment-wide association is met by our sample collection (Figure 1b,S3a,S3b), implying that we are well positioned to address the contribution of rare and low frequency polymorphisms in GWAS loci to IBD.

### **Section S2. DNA preparation and pooling**

Crohn's disease patients and Controls from NIDDK consortium were selected with priority given to samples with adequate amounts of DNA and those with GWAS data available. Samples from the NIDDK consortium undergo rigorous clinical phenotyping and control matching for genetic studies. DNA purification methods are also performed on these samples. The case/control samples selected have already been stringently matched in previous GWAS studies. The

baseline concentration of genomic DNA was quantified by Quant-iT™ PicoGreen® dsDNA reagent and detected on the Thermo Scientific Varioskan Flash. All DNAs were normalized to 20ng/μl and repeat quantification was performed to assess accuracy of the normalization step. The quantification and normalization was repeated again to ensure that all samples fell within the desired concentration range. A 10% variance was allowed, as that is the limit of quantitation of PicoGreen® detection system. The normalization steps were done with robotic automation using the Packard Multiprobe II HT EX. Equimolar amounts of each DNA in a pool of samples is essential thus the same robotic automation was used to guarantee a uniform pipetting error across all samples in all steps. Once each individual sample is normalized to 10ng/ul, groups of 50 individuals were pooled together using a Multiprobe or Packard Robotic to total 14 pools (700 samples).

### **Section S3. Target selection and design**

Candidate exonic targets from top GWAS published, confirmed genes along with a sample of other highly significant regions of interest were uploaded against HG17 freeze to an in-house database, which houses PRIMER3 software. Amplicons encompassing each target region (coding exons only) were designed using Illumina parameters including a minimum amplicon length of 150bp and maximum amplicon length of 600bp with no buffer sequence added. Additionally, Not1 tails were added to the primer pairs to provide a recognition site for downstream concatenation and shearing step. The primer design process was reiterative and included a validation step on 3 HapMap CEU samples to ensure oligo synthesis quality. Amplicons were validated by running PCR product on agarose gels to assess clarity of single bands. Amplicons that had 2/3 clear bands were considered validated. Pfu enzyme, used in Illumina sequencing protocol for PCR, was used in the characterization process. In total, 593 primer pairs passed and covered 95% of the 108 kb target. PCRs contained 20 ng of

pooled genomic DNA, 1x HotStar buffer, 0.8 mM dNTPs, 2.5 mM MgCl<sub>2</sub>, 0.2 units of HotStar Enzyme (Qiagen), and 0.25 μM forward and reverse primers in a 6- or 10-μl reaction volume. PCR cycling parameters were: one cycle of 95°C for 15 min; 35 cycles of 95°C for 20 s, 60°C for 30 s, and 72°C for 1 min; followed by one cycle of 72°C for 3 min. Each PCR product was then treated to similar steps used for the pooling of DNA individuals. The quantification, normalization, and pooling process was again required to ensure that equimolar PCR product went into library construction to have equal representation of all targets. PCR yield was assessed by the same quantification system and the lowest product yield was then used to normalize across PCR plates. Secondary confirmation was ascertained by testing one column of PCR product per plate on 2% agarose E-gel against 1kb DNA ladder to visualize PCR product size. The 593 PCR products were then combined, using the Packard Multiprobe II HT EX, resulting in an amplified target product per sample pool for sequencing.

## **Section S4. Discovery via Sequencing**

The PCR products for each pooled sample were concatenated using *NotI* adapters and sheared into fragments. Libraries were constructed by a modified Illumina single-end library protocol, with 225-275 bp gel size selection and PCR enrichment using 14 cycles of PCR, and then single-end sequenced with 76 cycles on an Illumina Genome Analyzer. Each sample pool was sequenced using a single lane of a Illumina GAII analyzer flowcell. 76bp, 36bp and 52bp reads were aligned to the genome using MAQ algorithm within the Picard analysis pipeline, and further processed using the SAMtools software and custom scripts.

### **Rare variant discovery with Syzygy**

In this study we have developed software called Syzygy to analyze pooled sequencing data. Syzygy is a sequencing analysis tool that allows: 1) rare variant SNP detection, 2) allele frequency estimation, 3) single marker association testing, 4) group-wise marker test association, 5) pooled experiment statistical summary and power evaluation, and 6) annotation of rare variants discovered in the pooled sequencing experiment from primary sequencing data in BAM/SAM format. Algorithm details are available in Syzygy.pdf on the online software site: <http://www.broadinstitute.org/software/syzygy>

## **Section S5. Validation**

137 high confidence Single Nucleotide Variants (SNVs) were assayed in two phases of genotyping using Sequenom MassARRAY iPLEX GOLD chemistry<sup>50</sup>. The 137 high confidence SNVs were randomly drawn and chosen based on functional annotation (nonsense, missense, splice). We did not take into account allele counts or allele frequency since we were interested in singleton detection as well. The first phase consisted of 72 SNVs and the second phase of 65 SNVs on 350 NIDDK Crohns samples and 350 NIDDK controls for validation purposes.

In each phase of Sequenom genotyping, oligos were synthesized and mass-spec QCed at Integrated DNA Technologies. All SNVs were genotyped in multiplexed pools of 25–36 assays, designed by AssayDesigner v.3.1 software, starting with 10 ng of DNA per pool. Around 7 nl of reaction was loaded onto each position of a 384-well SpectroCHIP preloaded with 7 nl of matrix (3-hydroxypicolinic acid). SpectroCHIPS were analyzed in automated mode by a MassArray MALDI-TOF Compact system with a solid phase laser mass spectrometer (Bruker Daltonics Inc.). We obtained high quality data (>95% genotype call rate, HWE  $P > 0.001$ ) in all samples that had at least one SNV.

Variants were called by real-time SpectroCaller algorithm, analyzed by SpectroTyper v.4.0 software and manually reviewed for rare variants.

In Phase 1, 72 SNVs passed QC (HWE and genotype call rate). Of the 72 SNVs that passed QC 68 were identified as True Positives (TP) and 4 were monomorphic (FP). In Phase 2, 65 SNVs passed QC. Of the 65 SNVs 57 were true positives and 8 monomorphic. The validation data suggests a high true positive rate of approximately 91.2%.

## **Section S6. Follow-up Genotyping**

We identified all nonsynonymous, nonsense, or splice site variants which occurred in 2 or more copies up to a frequency of 5% - a total of 115 variants. Excluding known GWAS associated low-frequency coding variants at NOD2, IL23R, and LRRK2/MUC19 follow-up genotyping was performed for 70 of these markers.

Follow-up genotyping was successfully performed for 70 of these markers in nine independent case control samples totaling 16054 CD patients, 12153 UC patients, 17575: 1) samples from the MGH-PRISM study (456 CD, 305 UC, 1009 controls), 2) samples assembled from throughout North America and Australia by the NIDDK IBDGC (2291 CD, 1921 UC, 1337 controls), 3) an Italian-Dutch case-control sample (696 CD, 1560 UC, 900 controls), 4) CCFA Repository Collection (366 CD, 77 UC, 525 controls), 5) Swedish samples (0 CD, 529 UC, 501 controls), 6) Cedars samples (1369 CD, 1009 UC, 0 controls), 7) German samples (2887 CD, 0 UC, 2244 controls), as well as ImmunoChip genotype data provided by 8) the International IBD Genetics Consortium (5264 CD, 3771 UC, 6575 controls) and 9) UK IBD Genetics Consortium (2507 CD, 2847 UC, 4484 controls) (n.b., rare coding variants discovered in this study were contributed to ImmunoChip design). Samples 1, 3, 4, 5, and 7 were genotyped for sets of

markers using Sequenom iPLEX, Sample 2 genotyping was done as part of a larger IBDGC Illumina GoldenGate study - because of design constraints and assay failures not all markers were examined in all eight follow-up sample sets.

Additional Sequenom Genotyping was carried out for 9 SNVs in 2887 CD cases and 2244 healthy controls from the German popgen biobank collection. German patients were recruited either at the Department of General Internal Medicine of the Christian-Albrechts-University Kiel, the Charité University Hospital Berlin, through local outpatient services, or nationwide with the support of the German Crohn and Colitis Foundation. German healthy control individuals were obtained from the popgen biobank. Written, informed consent was obtained from all study participants and all protocols were approved by the institutional ethical review committees of the participating centres.

Genotyping of the Italian cohort was performed at the Laboratory for Genetics and Genomic Medicine of Inflammation ([www.inflammgen.org](http://www.inflammgen.org)) of the Université de Montreal as described above.

Swedish ulcerative colitis patients and controls were from a large case-control cohort of individuals described in detail in previous publications.(1-3) Briefly, 529 UC patients (aged  $47.5 \pm 15.8$  SD, 57.1% males) and 501 healthy controls (aged  $44.6 \pm 14.6$  SD, 52.7% males) were recruited at the Karolinska University Hospital, Stockholm, and at the Örebro University Hospital, Örebro, Sweden. Diagnosis of ulcerative colitis was established based on standard clinical, endoscopic, radiologic and histologic criteria. Control individuals were healthy blood donors free of inflammatory disease. Informed consent was obtained from all participants, and local ethics committees approved the study.

Genotyping of Swedish UC cases and controls was performed at Karolinska Institutet's Mutational Analysis core facility (MAF) using matrix-assisted laser desorption/ionization time-of-flight (MALDI-TOF) mass spectrometry and the



iPLEX Gold chemistry on a MassARRAY Platform (SEQUENOM Inc., San Diego, CA, USA). Average genotyping success rate was 99.9% per marker, and none of the individuals included in the study had > 5% missing genotypes. Typer 4.0 Software Package (SEQUENOM) was used for post-run data QC, allele calling and generation of genotypes, and all rare variant "moderate" calls were manually inspected to avoid false-positives.

NIDDK IBDGC subjects were recruited by the Genetic Research Centers (GRC) comprising the NIDDK IBD Genetics Consortium: Cedars Sinai, Johns Hopkins University, University of Chicago and Yale, University of Montreal, University of Pittsburgh and University of Toronto. Additional samples were obtained from the Queensland Institute for Medical Research, Emory University and the University of Utah.

CD and UC diagnoses were confirmed by standard clinical, endoscopic, histologic and radiologic criteria. Medical history was collected with standardized NIDDK IBD Genetics Consortium (IBDGC) phenotype forms. Demographics, including smoking behavior were also collected. Healthy controls are defined as those with no personal or family history of IBD.

Recruitment protocols were approved by Institutional Review Boards at each GRC, and all participants provided signed consents for data sharing through dbGap.

The Illumina GoldenGate BeadExpress® 384 plex OPA assay was used. All genotyping was performed by the Laboratory of Genomics and Human Genetics at the Feinstein Institute for Medical Research. A total of 416 variants: 308 registered SNPs and 108 novel variants were submitted for SNP design. For those variants with poor design scores, surrogate SNPs having the highest LD and r-square value greater than 0.8 were chosen from the adjacent 150kb

flanking region, from the HapMap 3 CEU population. The final 384 plex included 282 SNPs and 102 novel variants.

### Grouping of samples

Samples were grouped based on informed ancestry. Samples from the ImmunoChip datasets were grouped into 8 separate clusters based on MDS estimates from GWAS data. Across all samples self-reported Jewish individuals were grouped together.

### Quality Control of ImmunoChip datasets

All ImmunoChip datasets have been quality-controlled separately with the following common parameters in order to achieve a high standard data-quality while keeping as much as possible data:

- i. Missing rate per SNP  $<0.05$  (prior to sample removal below).
- ii. Missing rate per individual  $<0.02$
- iii. Missing rate per SNP  $<0.02$  (after sample removal above)
- iv. Missing rate per SNP difference cases-controls  $<0.02$
- v. SNP frequency difference to HapMap  $<0.15$
- vi. Hardy-Weinberg Equilibrium (controls)  $p < 10^{-6}$

To assess relatedness between samples and population stratification, we used the chip-wide SNP data passing stringent quality control. We removed SNPs in the highly stratified the Major Histocompatibility Complex (chr 6, 25-35 MB) and the chromosome 8 inversion region (chr 8, 7-13 MB). We then pruned SNPs to insure that there was little linkage disequilibrium between SNPs ( $r^2 < 0.2$ ). We used the resulting 17,413 SNPs to assess recent common ancestry and population stratification with PLINK and EIGENSTRAT.

## Supplementary Tables

**Supplementary Table 1. List of sequenced CD candidate genes listed with GWAS associated SNP.**

| Gene                                                                 | SNP        | Chr   | Critical Region | Risk-Allele | RAF   | OR (Case/Control) | OR (TDT) |
|----------------------------------------------------------------------|------------|-------|-----------------|-------------|-------|-------------------|----------|
| <b>Confirmed evidence of association to CD (Barrett et al. 2008)</b> |            |       |                 |             |       |                   |          |
| MAST3                                                                | **         |       |                 |             |       |                   |          |
| NCF4                                                                 | **         |       |                 |             |       |                   |          |
| IL12B                                                                | rs10045431 | 5q33  | 158.69-158.76   | C           | 0.708 | 1.11              | 1.36     |
| JAK2                                                                 | rs10758669 | 9p24  | 4.94-5.26       | C           | 0.348 | 1.12              | 1.21     |
| CARD9                                                                | rs10870077 | UC**  |                 |             |       |                   |          |
| C10orf22                                                             | rs10995271 | 10q21 | 64.05-64.12     | C           | 0.387 | 1.25              | 1.53     |
| EGR2                                                                 | rs10995271 | 10q21 | 64.05-64.12     | C           | 0.387 | 1.25              | 1.53     |
| ZNF365                                                               | rs10995271 | 10q21 | 64.05-64.12     | C           | 0.387 | 1.25              | 1.53     |
| LRRK2                                                                | rs11175593 | 12q12 | 38.61-39.31     | T           | 0.017 | 1.54              | 1.44     |
| MUC19                                                                | rs11175593 | 12q12 | 38.61-39.31     | T           | 0.017 | 1.54              | 1.44     |
| NKX2-3                                                               | rs11190140 | 10q24 | 101.26-101.32   | T           | 0.478 | 1.2               | 1.28     |
| IL23R                                                                | rs11465804 | 1p31  | 67.4            | T           | 0.933 | 2.5               | 2.77     |
| C1orf106                                                             | rs11584383 | 1q32  | 197.60-197.77   | T           | 0.697 | 1.18              | 1.2      |
| KIF21B                                                               | rs11584383 | 1q32  | 197.60-197.77   | T           | 0.697 | 1.18              | 1.2      |
| IRGM                                                                 | rs11747270 | 5q33  | 150.15-150.32   | G           | 0.09  | 1.33              | 1.31     |
| TRIB1                                                                | rs1551398  | 8q24  | 126.60-126.62   | A           | 0.619 | 1.08              | 1.25     |
| IRF8                                                                 | rs17445836 |       |                 |             |       |                   |          |
| CREM                                                                 | rs17582416 | 10p11 | 35.30-35.60     | G           | 0.345 | 1.16              | 1.26     |
| CUL2                                                                 | rs17582417 | 10p12 | 35.30-35.61     | G           | 0.345 | 1.16              | 1.26     |
| NOD2                                                                 | rs2066847  | 16q12 | 49.3            | C           | 0.018 | 3.99              | 2.57     |
| IRF1                                                                 | rs2188962  | 5q31  | 131.44-131.90   | T           | 0.425 | 1.25              | 1.26     |
| LOC44110E                                                            | rs2188962  | 5q31  | 131.44-131.90   | T           | 0.425 | 1.25              | 1.26     |
| P4HA2                                                                | rs2188962  | 5q31  | 131.44-131.90   | T           | 0.425 | 1.25              | 1.26     |
| PDLIM4                                                               | rs2188962  | 5q31  | 131.44-131.90   | T           | 0.425 | 1.25              | 1.26     |
| SLC22A4                                                              | rs2188962  | 5q31  | 131.44-131.90   | T           | 0.425 | 1.25              | 1.26     |
| SLC22A5                                                              | rs2188962  | 5q31  | 131.44-131.90   | T           | 0.425 | 1.25              | 1.26     |
| ZNF300                                                               | rs2188962  | 5q31  | 131.44-131.90   | T           | 0.425 | 1.25              | 1.26     |
| CD244                                                                | rs2274910  | 1q23  | 157.65-157.72   | C           | 0.682 | 1.14              | 1.62     |
| ITLN1                                                                | rs2274910  | 1q23  | 157.65-157.72   | C           | 0.682 | 1.14              | 1.62     |
| ITLN2                                                                | rs2274910  | 1q23  | 157.65-157.72   | C           | 0.682 | 1.14              | 1.62     |
| CCR6                                                                 | rs2301436  | 6q27  | 167.32-167.52   | T           | 0.463 | 1.21              | 1.16     |
| PTPN22                                                               | rs2476601  | 1p13  | 113.79-114.17   | G           | 0.899 | 1.31              | 1.17     |
| PTPN2                                                                | rs2542151  | 18p11 | 12.73-12.88     | G           | 0.152 | 1.35              | 1.14     |
| ORMDL3                                                               | rs2872507  | 17q21 | 34.63-35.34     | A           | 0.473 | 1.12              | 1.24     |
| C13orf31                                                             | rs3764147  | 13q14 | 43.13-43.54     | G           | 0.221 | 1.25              | 1.19     |
| ATG16L1                                                              | rs3828309  | 2q37  | 320.9           | G           | 0.533 | 1.28              | 1.3      |
| SP110                                                                | rs3828309  | 2q37  | 320.9           | G           | 0.533 | 1.28              | 1.3      |
| SP140                                                                | rs3828309  | 2q37  | 320.9           | G           | 0.533 | 1.28              | 1.3      |
| TNFSF15                                                              | rs4263839  | 9q32  | 114.61-114.78   | G           | 0.677 | 1.22              | 1.07     |
| TNFSF8                                                               | rs4263839  | 9q32  | 114.61-114.78   | G           | 0.677 | 1.22              | 1.07     |
| PTGER4                                                               | rs4613763  | 5p13  | 40.32-40.48     | C           | 0.125 | 1.32              | 1.28     |
| SBNO2                                                                | rs4807569  | 19p13 | 1.05-1.15       | C           | 0.217 | 1.02              | 1.26     |
| CDKAL1                                                               | rs6908425  | 6p22  | 20.63-20.84     | C           | 0.78  | 1.21              | 1.09     |
| STAT3                                                                | rs744166   | 17q21 | 37.74-37.95     | A           | 0.565 | 1.18              | 1.25     |
| ICOSLG                                                               | rs762421   | 21q22 | 44.43-44.48     | G           | 0.389 | 1.13              | 1.21     |
| PRDM1                                                                | rs7746082  | 6q21  | 106.52-106.62   | C           | 0.289 | 1.17              | 1.19     |
| GCKR                                                                 | rs780094   | 2p23  | 27.30-27.77     | T           | 0.397 | 1.08              | 1.13     |
| C11orf30                                                             | rs7927894  | 11q13 | 75.80-76.02     | T           | 0.386 | 1.16              | 1.07     |
| LRRC32                                                               | rs7927894  | 11q13 | 75.80-76.02     | T           | 0.386 | 1.16              | 1.07     |
| IL18R1                                                               | rs917997   | 2q11  | 102.31-102.64   | T           | 0.222 | 1.05              | 1.11     |
| IL18RAP                                                              | rs917997   | 2q11  | 102.31-102.65   | T           | 0.222 | 1.05              | 1.11     |

**Supplementary Table 2. Primers designed for CD pooled sequencing experiment.**

| Amplicon                  | Gene   | Forward Primer            | Reverse Primer             | Amplicon Length |
|---------------------------|--------|---------------------------|----------------------------|-----------------|
| SBNO2_e30_a001_0-100      | SBNO2  | GTAGCCACTCTCCCAGGGCT      | CTCTCCTACAAGGTGGGGTC       | 348             |
| SBNO2_e14_a001_0-100      | SBNO2  | CACATTCAGCACCTCTGGGT      | CAACTTAGTCGTCCCCTGAC       | 301             |
| SBNO2_e07_a001_0-100      | SBNO2  | TTAGTCCCATGAGAGGGCA       | GAACAGCAGGAGAGCAAGACC      | 289             |
| SBNO2_e04_a001_0-100      | SBNO2  | GAGGTCAGTCCAGGC           | GTTGAGCACCCCATCTCACC       | 268             |
| GCKR_e04_a001_0-100       | GCKR   | AATTTTGTGATGAGAGGGG       | GCCACCTGGGAGCTTAGTTA       | 287             |
| GCKR_e19_cds_a001_0-100   | GCKR   | TGATGACCTCATTCCCTCAG      | AATATTTCTCCCTACCCTGGGCT    | 364             |
| LRRK2_e01_cds_a001_0-100  | LRRK2  | CTTCCTCATAAACAGGCGGG      | GTTTGCAAAAATAAAAGCACAGTTTA | 360             |
| LRRK2_e41_a001_0-100      | LRRK2  | CATTTGAATAAGATTTCTGTGC    | TCACATCTGAGGTCAGTGGTTATC   | 261             |
| MUC19_e12_a001_0-100      | MUC19  | GGCTCAGAGGGTTCTATTTTCTCAG | TCCTCAACAGAGGACTCAATTTT    | 291             |
| MUC19_e17_a001_0-100      | MUC19  | GGGGCTTCAGTCATGGAATA      | TGAGGAAAATGTCCACTAAGTTC    | 277             |
| ICOSLG_e07_cds_a001_0-100 | ICOSLG | TCTGGGAGTCCATGCTCAAG      | CAGCTTGCTAAAACACGGC        | 285             |
| IL18R1_e08_a001_0-100     | IL18R1 | GTGATGATGGACAACACTGGTA    | AGAACATAAGGTAAGAAATTCCAGC  | 268             |
| PTPN22_e13_a001_25-59     | PTPN22 | GATGAAAATAAGGATTTTCCACTAA | AAGGTGCCAATAACACGGAC       | 296             |
| P4HA2_e14_a001_0-100      | P4HA2  | GATGGGGGTGGGATATAAGG      | AGCCTGTTGTAACTTGGGTGA      | 290             |
| P4HA2_e12_a001_0-100      | P4HA2  | TTCCAGATTTGGGATTCACC      | GGCTGCTACAGAGCTGTTTCT      | 283             |
| P4HA2_e10_a001_0-100      | P4HA2  | TTGAGCAGCTACGAACCCCT      | CAGACTCTTGCCCTCAACTG       | 280             |
| P4HA2_e06_a001_0-100      | P4HA2  | TAAAGAGACACATGCGGGACA     | CTCTTTGTGGCTGCCTCTCT       | 268             |
| P4HA2_e03_cds_a001_0-100  | P4HA2  | TCTGCCAGTTCCACTCTCTCT     | CTTTTTCACTTTGTTGATCCAGTG   | 288             |
| CARD9_e04_a001_0-100      | CARD9  | CAGAAGGTCCAGTGAGCCTG      | AACACGGCACCATCTGACACT      | 476             |
| KIF21B_e27_a001_0-100     | KIF21B | CAAGGACCATCCACAGGCTC      | GAAGCCAGCACCAAGTAGG        | 258             |
| KIF21B_e22_a001_0-100     | KIF21B | ACTGGAATGCCAAGGAGCTG      | GGTAACTCCAGGCTTTGTTCC      | 244             |
| KIF21B_e12_a001_0-100     | KIF21B | ATCACCATGGTAACCAGTCAGAG   | CTAATCCAGTTCCTGTCCT        | 278             |
| KIF21B_e11_a001_0-100     | KIF21B | TCCTAAACACTGGTGGGCAG      | GCTACGGTGAGTGAGTGAGC       | 430             |
| SP110_e20_cds_a001_0-100  | SP110  | AGTGTCTGGGTTTGGGTCCT      | TCCTTCAATGTGTTTGTGTTGCT    | 276             |
| SP110_e17_a001_0-100      | SP110  | TGAGTTTGGGCATTAATCGT      | CCCTCTGCTCACCTTGTGTC       | 279             |
| SP140_e01_cds_a001_0-100  | SP140  | CTCAGAGCTGCAGGAAGGAA      | ACAGCCAATCCCTGCAATTT       | 288             |
| SP140_e21_a001_0-100      | SP140  | TGGTGAGTGGCCATAGTCTG      | TTGGTGAATAAACAGTCTCCTCAT   | 286             |

Supplementary Information for Rivas *et al.*

|                           |          |                                 |                             |     |
|---------------------------|----------|---------------------------------|-----------------------------|-----|
| SP140_e24_a001_0-100      | SP140    | TGTTTTTCCTTCATATCCCAGG          | ACAAAAGAGAGACGCCTGC         | 288 |
| SBNO2_e15_a001_0-100      | SBNO2    | GTCACCTGATGACGCCTGTG            | GAATGTGGGTCGCTCGTTTC        | 486 |
| SBNO2_e13_a001_0-100      | SBNO2    | GGACAGCCAGGCAGAAAGAC            | CTTCAGAATACTCCTTAACCCACG    | 212 |
| SBNO2_e09_a001_0-100      | SBNO2    | AGGACCTCGTGTTGCTGTTG            | CATACCCTTTACCTTGCCCTCC      | 306 |
| GCKR_e01_cds_a001_0-100   | GCKR     | CTGCCAACTGGAAGCAGAGT            | GTGCTCTGGGCATATTAGGG        | 280 |
| GCKR_e15_a001_0-100       | GCKR     | GGACGGGGTGAATATCCTGA            | GAAAGAGGAGCAGGAGAGGC        | 277 |
| GCKR_e17_a001_0-100       | GCKR     | TTTTCTGTCTGATAACAGGGC           | CTAAGCATTGAGGCCAGGTC        | 286 |
| LRRK2_e16_a001_0-100      | LRRK2    | AGGGCATTAGCTGGTGACTG            | TCGCACAAGTTCCCAAATTC        | 266 |
| MUC19_e09_a001_0-100      | MUC19    | CTGCAGGAGTCAAGACTGGC            | ACCCTCAAATGTGAGACAAAAT      | 266 |
| MUC19_e22_a001_0-100      | MUC19    | GGCCAACCTAGATCAATTCTATGA        | TCCAGGGAAAGAAAACCAGA        | 293 |
| ICOSLG_e05_a001_0-100     | ICOSLG   | AAACACTAACATCCACAATATGGG        | TGCAACACTTTCTACTCAAGGA      | 285 |
| ICOSLG_e02_a001_0-100     | ICOSLG   | TCCGGAGTTTGCAGAAGTGT            | CTCACCTGCCTTTCTGGTTG        | 283 |
| C11orf30_e18_a001_0-100   | C11orf30 | TGCTGTGGTGATTTCTGGAG            | TCTTATTTCAAGCATGGGCA        | 255 |
| IRF8_e05_a001_0-100       | IRF8     | TGAAACTTGACTTTTGTCTCCTG         | CTGGTGACAATTCTAGGCCAC       | 279 |
| IL18R1_e03_a001_0-100     | IL18R1   | TTTGCAAAGTTTCTGTAGCATTAT        | TAGCTCTCAGCCCCTCATTT        | 293 |
| PRDM1_e06_a001_38-65      | PRDM1    | GAATACGGTGTCCCCTGTGG            | AGAAGTGGGGTTGAGCATGG        | 325 |
| PTPN22_e11_a001_0-100     | PTPN22   | CCCTTGACCAAAGCAAGTA             | TCGTCCTTTTGGGTCTGCTA        | 268 |
| PTPN22_e10_a001_0-100     | PTPN22   | GCACGTAATGGTAAATTGGTGTTA        | AGCAGATGCCATGGAAGTACA       | 288 |
| PTPN22_e08_a001_0-100     | PTPN22   | GGTTCATTTTGGGTAGAAGGTTTAT       | accagccTCAACTTTAATCTTATG    | 353 |
| KIF21B_e23_a001_0-100     | KIF21B   | TTGAAATCGTCATGGCTGGT            | CTTGGACAGGGCTTCTCAAC        | 291 |
| SP110_e19_a001_0-100      | SP110    | CCCAGGCTGAAACTGAGTGTA           | TAACGTACCTCTGGTGGCT         | 272 |
| SP110_e11_a001_0-100      | SP110    | GGCCCTCCTACATTGAGCTA            | ACTCCTGAAAGGGTAGGGGC        | 274 |
| C11orf30_e05_a001_0-100   | C11orf30 | ACCCTTGTAGCAGCGCTTTC            | AGAAAAGTAATCTCTAACACAGGCATA | 248 |
| C11orf30_e07_a001_0-100   | C11orf30 | AAGTGTATAATGCAAGATTAGTTTGG<br>T | AATTGGCAGGCAGAGACTCC        | 352 |
| C1orf106_e03_a001_0-100   | C1orf106 | ATCTTCAGCCTCCCTGAGCA            | GAATCCCTCAAGAATGGGG         | 275 |
| CARD9_e13_cds_a001_0-100  | CARD9    | CACCAGATTCCTCGTTCCAG            | GTTTTGAGAACTACCGCAGG        | 330 |
| IRF8_e06_a001_0-100       | IRF8     | GCATTTGTGAAACAATGGCTC           | CTTTGTCTTCAAACAGTGCCC       | 290 |
| KIF21B_e16_a001_0-100     | KIF21B   | TAGGACAGTGGAGACTGAGGC           | CCCTGTCTCACCACCATAAT        | 254 |
| KIF21B_e25_a001_0-100     | KIF21B   | ACTCCAACCCACATTCTCTGC           | CAAGTTGATCCACCCTGTTCTT      | 270 |
| KIF21B_e34_cds_a001_0-100 | KIF21B   | AAGAAGCAGCTCAGATCGAA            | CTTTCTTTCTTGTTCCGACTTTG     | 281 |
| LRRK2_e35_a001_0-100      | LRRK2    | GGGTGTTTTGTGAGGCTGTATAAC        | TGCCATCTCCCTAATTTCTCTAAA    | 285 |
| MUC19_e08_a001_0-100      | MUC19    | CTGGAATAGGCCCTCTGAGT            | TAAGGAAGCTTTGGCCTCTG        | 270 |

|                             |          |                                 |                              |     |
|-----------------------------|----------|---------------------------------|------------------------------|-----|
| MUC19_e26_a001_0-100        | MUC19    | GGGAGTTTTTGGTTCAGGCT            | TGTACATGCCCAAATGATGG         | 277 |
| MUC19_e27_a001_0-100        | MUC19    | AATTTGTGCCATCATTGGG             | TGCTGCATCTTGCTGATGTT         | 269 |
| ORMDL3_e04_cds_a001_0-100   | ORMDL3   | TGTCCAGAGGCTTCTTCTTTCT          | GGGTCCCCCAACAGTCTTT          | 282 |
| P4HA2_e05_a001_0-100        | P4HA2    | AGACACAACAACCCAGGCAT            | AAGACCTATGTGGGTGGACG         | 273 |
| P4HA2_e09_a001_0-100        | P4HA2    | TTCAGTGACCCGAGAAGGAC            | CAGACTGGGACCGAGGATTA         | 274 |
| P4HA2_e17_cds_a001_0-100    | P4HA2    | GTCTGTACGTTGACATGGG             | AATTCTTCAGCAAATTGAGGC        | 278 |
| PTPN22_e01_cds_a001_0-100   | PTPN22   | GGAAAATTGGACCCCATAG             | ACAGCCTTCAGCATGCTCTG         | 281 |
| PTPN22_e16_cds_a001_0-100   | PTPN22   | CCATTCTTCCAATCTTAGGGC           | TGCCATGGGATATAAAAATCAGTG     | 290 |
| PTPN22_e21_cds_a001_0-100   | PTPN22   | GGTGTACTTGCAGCCCATATTA          | TGGTCAAGATGCTGCCTAAC         | 238 |
| SBNO2_e03_a001_0-100        | SBNO2    | CTGCACCCAGAACTCCGTTT            | CAGGTCCCTGCTTCCCACT          | 200 |
| SP110_e06_a001_0-100        | SP110    | ACACAGAAACAAAGGCAAGC            | TCCCACTCTATGCCATCCTT         | 274 |
| C11orf30_e19_a001_35-85     | C11orf30 | AAAACCTCTGCAGTGCTTCCA           | GATTTTTGGTTGGTTCGGAGC        | 303 |
| C1orf106_e01_a001_0-100     | C1orf106 | GGACAGATGTCTTGGGATCTT           | CTAAGGCTGAAGACCGTGGGT        | 277 |
| GCKR_e13_a001_0-100         | GCKR     | CCACAAGGGCTACTCCTCAC            | TTTTCTTCCACCCTCAGCAC         | 275 |
| LRRK2_e06_a001_0-100        | LRRK2    | GATTACACTTGATGTATCTCACACAA<br>C | ATGAATGGGTTGAGCATCCA         | 366 |
| LRRK2_e20_a001_0-100        | LRRK2    | TGATTTCTAAGTTGCTGGTGTATCT       | TGGGTCCTATTGTTCAATGTCA       | 292 |
| LRRK2_e50_a001_0-100        | LRRK2    | GAATTGTGAATTCAGTTCCAAGG         | TCATTCACATCATTGCCCTG         | 241 |
| MUC19_e19_a001_0-100        | MUC19    | CTGGGATAACTACTGGCACGA           | AGCAAAGAACTGTTGAGAACCC       | 285 |
| MUC19_e35_cds_a001_0-100    | MUC19    | AAAAGAATAAATTGGTTACAAGGCT       | AGGCCTGTAAAACCTGGGAAGG       | 333 |
| PRDM1_e06_a002_77-100       | PRDM1    | ATGAAGGACAAGGCCTGTAGC           | CCCCTTGACTGCTCTCTCT          | 291 |
| PTPN22_e04_a001_0-100       | PTPN22   | CCTGAACCCTGAAGTCCAC             | aaaGGAAGCGGAGGACTAGG         | 260 |
| C1orf106_e10_cds_a001_0-100 | C1orf106 | ATTTACCCACCTGTCCTTTCTT          | CTTAGGTCAGGGCTTCTGAAA        | 300 |
| GCKR_e08_a001_0-100         | GCKR     | TCATCATGCCCTTCTCTCTC            | GGGGCACCCCATATTTACTT         | 266 |
| GCKR_e10_a001_0-100         | GCKR     | TCTTCATCCTCTCCCAATTCC           | CTGCAGTCTTACTGCCACCA         | 276 |
| GCKR_e12_a001_0-100         | GCKR     | GATTGCATGTTGAAGGGTCA            | ACAGTGTTTGGAGAGCAGCC         | 280 |
| IL18R1_e07_a001_0-100       | IL18R1   | CGAACAGAGCCTACTGCTAAA           | TGGGTTCTGGTGTGGAAAAT         | 279 |
| SBNO2_e18_a002_0-100        | SBNO2    | CTCTTCCCTAAGCGTTCCAT            | CTCCACACAGGAGACCCTCT         | 423 |
| SBNO2_e16_a002_0-100        | SBNO2    | CAGGAAGGACCTGGAAGAAG            | CCCATCCTGCCCTAAATTCC         | 383 |
| SBNO2_e02_cds_a002_0-100    | SBNO2    | AAAAGCTGGGGCCATGAGTAG           | CGTCTCCCTCTGCAGATCAT         | 456 |
| GCKR_e11_a002_0-100         | GCKR     | TCTAAGGGAGCTGTGCCTTC            | CCCTGCTCTCAGTATTCTCCA        | 259 |
| LRRK2_e10_a002_0-100        | LRRK2    | GCACGTGCAGGTAGGACTCT            | TTCTAACAATAAAAAGTTACGGTTAAGG | 273 |
| LRRK2_e36_a002_0-100        | LRRK2    | CTTGTTGTTGTGTGCAGTAGATT         | AAACCTCATACTGTGCGAAAG        | 322 |

Supplementary Information for Rivas *et al.*

|                          |          |                             |                            |     |
|--------------------------|----------|-----------------------------|----------------------------|-----|
| LRRK2_e49_a002_0-100     | LRRK2    | GGTGGTGGTGCATGTTTTAAT       | GGAAAGTTCAGAGAAAATGTAAACG  | 411 |
| MUC19_e30_a003_0-100     | MUC19    | TGGTTTGTATGTAGCCTGGAG       | ACACCTGCCTAGTATTATGTTTCGAC | 280 |
| PTGER4_e02_cds_a005_0-27 | PTGER4   | GCAGCTTTGTCTCTCTTCTACC      | CTTCATGTACGTGGCGATGG       | 319 |
| IRF8_e08_a002_0-100      | IRF8     | GAGTTGGAGGTCATCTCGGC        | CCAAACTTGATCCTTACATGAC     | 550 |
| IL18R1_e02_a002_0-100    | IL18R1   | AAAAAGTTACCTTGTCATTTTTGGT   | AAGGACAAGAGGGCTGTGAA       | 356 |
| CARD9_e02_cds_a002_0-100 | CARD9    | CTCCGAGCTGACTCTGTGGT        | CACTGTGTCTCTGCTGCCTC       | 457 |
| C1orf106_e04_a002_0-100  | C1orf106 | TCTATGGAAGGCAGGCACAT        | GATCAGCTTTGGGGATCGAG       | 258 |
| C1orf106_e09_a004_36-63  | C1orf106 | CTCCCAAGACCCATCGTCAC        | GAGTGCCCTCCTCCTCGTAAG      | 201 |
| SP110_e13_a002_0-100     | SP110    | TGCAGTCTAGCTAGCAGGGTC       | TCAAAGGAAGATGGAGTGAAG      | 272 |
| SP140_e12_a002_0-100     | SP140    | AGCATTTTCCCATCTTGGAT        | GCGAATGTGAAGAAGAGAAGG      | 282 |
| SP140_e17_a002_0-100     | SP140    | TGTACTIONAACCTCCACGCTG      | TGACAGTGCCTAATAAACTC       | 280 |
| SBNO2_e27_a002_0-100     | SBNO2    | TCTCACCCAGTACCCTCGCT        | CAAAGCAGGGAGAGGGATTC       | 502 |
| C11orf30_e11_a002_0-100  | C11orf30 | CTTGACACCTTGAAATTCCATT      | TCCTCTCAATGAAGGCCACC       | 352 |
| PTPN22_e03_a002_0-100    | PTPN22   | CTCACCTAGTCTCCGCTTCC        | actcatGAGCATACACTATTCACAG  | 551 |
| CARD9_e11_a002_0-100     | CARD9    | CTGTGATCGGTACCCCTGAG        | GAAAGCAGAGTCTACACTGGACCC   | 283 |
| CARD9_e03_a002_0-100     | CARD9    | AGCTCAGGGCTCCTAGGGAT        | CGCAGGGTACCTCATCCAAG       | 383 |
| KIF21B_e28_a002_0-100    | KIF21B   | AAAGGAAGCAGGGGTGAGTAG       | ACACACGTGCCTTGATCAGC       | 274 |
| KIF21B_e19_a002_0-100    | KIF21B   | CCAGAGAAGTTGGAGGTGTCA       | GGTTAAAAGGAGTCCCATCCA      | 264 |
| KIF21B_e13_a002_0-100    | KIF21B   | GGGCCTGGACACCATTATCT        | CCCTCCTAGAGGGGTTCTGC       | 417 |
| SP140_e23_a002_0-100     | SP140    | GGTTCCTGAATCCCTTCAA         | ACACAGCCACATACTCCAGC       | 267 |
| SBNO2_e30_a005_0-100     | SBNO2    | AGGCAGTCCTTACCCTCCTG        | CTCTCCTACAAGGTGGGGTC       | 590 |
| SBNO2_e21_a002_0-100     | SBNO2    | CACCTCCTCACCCACTAGGC        | GACCACTGTAGGACATAGGGAAG    | 449 |
| LRRK2_e30_a002_0-100     | LRRK2    | AATATGCTAAAAGTGGTCAATCCTA   | TTGTTTGCCCAAATAAATTAAC     | 406 |
| MUC19_e07_cds_a002_0-100 | MUC19    | CCAAGTAAAAATGGGAAGTTGG      | ATATCAGGCAGCTATTCATACTTTC  | 262 |
| MUC19_e34_a002_0-100     | MUC19    | CCTCAATAATGTTGTGAAGTAGTTGC  | CCATTTTCTCCACAAGGTTACAA    | 276 |
| GCKR_e06_a002_0-100      | GCKR     | TACGCCATAGGCTTCTGCTT        | GGATTCCAGGGCACAAATCT       | 276 |
| LRRK2_e12_a002_0-100     | LRRK2    | GAATTATCTTTAAGCTGTCAATGAACT | TGATATTCTACCTGGCCCAAT      | 340 |
| C11orf30_e20_a005_55-100 | C11orf30 | CACTGGTGAAGCAGGATCATT       | AAACCCACAACCCCAAGAT        | 289 |
| IRF8_e07_a003_6-100      | IRF8     | GTGATCAGCTTCTACTATGGGG      | GATAGGAGGCGTGATCTCTAAG     | 428 |
| IRF8_e09_cds_a002_0-100  | IRF8     | GTCAAAGACAGTGCCACCC         | CATTCTTTAATCATGATGCGGG     | 328 |
| C1orf106_e05_a002_0-100  | C1orf106 | ATCTCCCTGCCTCTCTAGCC        | GAGCCAAATGCAAAGGCAGT       | 363 |
| KIF21B_e04_a002_0-100    | KIF21B   | AAGTGAGGGCTTGGGACTACC       | GATTCAAAACCCAGAGGGGAC      | 368 |
| GCKR_e07_a002_0-100      | GCKR     | CACTGACATTGACCAGAGACC       | TCCATTCCCACTCACTTCT        | 290 |

|                           |              |                                 |                             |     |
|---------------------------|--------------|---------------------------------|-----------------------------|-----|
| CUL2_e21_cds_a001_0-100   | CUL2         | AACAGCAGAAAACAGGGGCT            | TGGCAGTAGTTTGACTTCCAC       | 290 |
| CUL2_e20_a001_0-100       | CUL2         | GCCCTCTACCCTAAGAAGCC            | TGCACTCACTGATAAAATGAATTG    | 243 |
| CUL2_e18_a001_0-100       | CUL2         | CTGATGATGCTTAAATTCTTTGGA        | GAATGGTCAATTCAGTGTGCTGATTT  | 280 |
| CUL2_e15_a001_0-100       | CUL2         | CGTACTGAAATGATTAGTAAATGCTC<br>A | AGACCTAGCAATACCGACACAT      | 290 |
| CUL2_e14_a001_0-100       | CUL2         | TTTCTAGGACAATACCACATTAAGA       | AGTGAAGACAGGCTCACGA         | 297 |
| CUL2_e10_a001_0-100       | CUL2         | TGGCATGGTAAGACTTTTTCTTT         | TGGGAGTTAACCCTCAGATGTC      | 269 |
| CUL2_e08_a001_0-100       | CUL2         | AAACCAGGCCAGATACAAAAT           | TCCCCTTAAAGGTAACAGCC        | 271 |
| CUL2_e06_a001_0-100       | CUL2         | CAGTAAACCAGCCCCAAGG             | TCAGCCCTGATGATTTTCGT        | 226 |
| CUL2_e04_a001_0-100       | CUL2         | CCCCACAGCAGAGAAAAGTC            | TGACAGTGAAAATGATTATTGCTT    | 297 |
| CREM_e05_cds_a001_0-100   | CREM         | TGCTGTGTTACAACACTGTGAG          | ACCCCTCTTTTACAAGGCT         | 284 |
| CREM_e06_cds_a001_0-100   | CREM         | CAGAAAATGACTGTTCCAGGAC          | TGGCTGTGGTGTCTGAATTAC       | 298 |
| CREM_e10_cds_a001_0-100   | CREM         | ATAGGGCTTGGGTTTCAGTG            | TGAAACACTCAGATGTTCTGAAT     | 289 |
| CREM_e11_cds_a001_0-100   | CREM         | CCGCTTTGTAATAATGCTGCT           | CCCGCCAGCTTATACAATACAT      | 284 |
| CREM_e12_a001_0-100       | CREM         | TAAGGAGGGGAAGAGGAAGGG           | ACTACATATCTCTCTTTGCAAGCTTTA | 262 |
| CREM_e14_cds_a001_0-100   | CREM         | GGAAGGCTGTTCTGTAGTCAT           | ACGTGTCCTTCCCACAAGTC        | 278 |
| CREM_e14_cds_a001_0-100   | CREM         | CTTTGTTTGCCCTTTGCTTC            | CCACCATTCTTGCCAGCTAT        | 260 |
| TNFRSF6B_e06_a001_0-100   | TNFRSF6<br>B | TTCCCCTGACCCTGTTCTTC            | AGGAGTGAGGGCACAAGTGG        | 291 |
| TNFSF8_e04_cds_a001_0-100 | TNFSF8       | GCTTTCTTCTGAAGGCCAA             | TGCGTACCTACAATCTTCTCAATAAT  | 477 |
| TNFSF8_e03_a001_0-100     | TNFSF8       | CATTTGGCCATGGGACTCTA            | AGAACGGTAATTGTCTCCATCAA     | 278 |
| TNFSF8_e02_a001_0-100     | TNFSF8       | GTGGGGATGAGTTCAGGAGC            | TGTCACACCTCATGCTGCTT        | 280 |
| TNFSF8_e01_cds_a001_0-100 | TNFSF8       | AAAAGGAAAGGGAGGAAGAGG           | CCCAGAACTGAATCAGATGAAGA     | 286 |
| TRIB1_e03_cds_a001_0-100  | TRIB1        | GGAAATAATGGCTTGGTTCCTC          | GGTGTTAAGAATTATGAGGTTTCTGA  | 535 |
| FASLG_e01_cds_a001_0-100  | FASLG        | AAGTAAACCCTTTGCTGGGG            | GAAAAGCACTTTGCAAGCCAG       | 478 |
| PRDM1_e07_a001_0-100      | PRDM1        | AGAGCCAGCTTGAGAGCAGA            | TGTTGGCTTTAACTACGGGC        | 270 |
| PRDM1_e02_cds_a001_0-100  | PRDM1        | TCCAGCACTGTGAGGTTTCA            | ACCAGGTCCCCAATCTTCTT        | 272 |
| P4HA2_e15_a001_0-100      | P4HA2        | GCCTTGCTTCAACCTCTGAC            | CATGGGAAGAGCCTTTCTTG        | 276 |
| P4HA2_e14_a002_0-100      | P4HA2        | AAACAGAGGCCAACTCTCCC            | CGTAAGTACTGGGTCCAGGC        | 282 |
| P4HA2_e08_a001_0-100      | P4HA2        | AGAGTCCAGGTCCACAGCTT            | CCTTTTCTTCTCATTCTTG         | 274 |
| P4HA2_e07_a001_0-100      | P4HA2        | ATTCCCATCTTACCTTCCCCTA          | GGAGCCTGACAATTTACTTCC       | 305 |
| ORMDL3_e03_a001_0-100     | ORMDL3       | CTGGTGTCTTCTGTAGCCC             | TTGTGTCTGTGACTGGGTGG        | 262 |
| MUC19_e32_a001_0-100      | MUC19        | CAAAGTGCCTCTGGAAAATCA           | TGAATCTCGGCGTTCATTAG        | 267 |



Supplementary Information for Rivas *et al.*

|                             |          |                             |                             |     |
|-----------------------------|----------|-----------------------------|-----------------------------|-----|
| MUC19_e30_a002_0-45         | MUC19    | GCCAATTACAGTACTGGCCACC      | AGGGCACTCCTCAGGTTTACA       | 299 |
| MUC19_e23_a001_0-100        | MUC19    | TCCATGAATTCTCATCTGGC        | TGAGCATGTAATCTTCATTTGAGAC   | 278 |
| MUC19_e18_a002_0-100        | MUC19    | GGAATTCATAAATTGATTATCTCCTCT | AGTTGCCATTCCAACCTCCAG       | 290 |
| MUC19_e16_a001_0-100        | MUC19    | CATGGTGACAGGATAGCACAA       | TCCAGTGGTATTCCCAGGGT        | 286 |
| MUC19_e10_a001_0-100        | MUC19    | GGAGCAAAAAGGTCAGTGGA        | AAAGGGAGCTTTCTTCTCAGC       | 283 |
| LRRK2_e33_a001_0-100        | LRRK2    | TCAGTGTCTCAAATATGCTTAAATATG | CCCCGTGCCACAAAAATAAA        | 351 |
| LRRK2_e31_a001_0-100        | LRRK2    | GCAAACACAAGAGGGTTTTG        | AATAAATTACATTTCTCTACCAGCCT  | 290 |
| LRRK2_e19_a001_0-100        | LRRK2    | GCCAGTCTCCTAAAAGGAAGAAA     | TGGCATGAATAACCACTAAAAGACTA  | 410 |
| LRRK2_e13_a001_0-100        | LRRK2    | GGTTCTGCCCTCCTGTACTT        | TTGTTATCTCTTCCCACAATCAAC    | 252 |
| LRRC32_e03_cds_a004_91-100  | LRRC32   | GCTGATCTCATTGGTGCTCA        | GCAGGGTTCCTGGATAAACA        | 259 |
| LRRC32_e03_cds_a005_55-75   | LRRC32   | ATTC AAGAGCTGGGAAAGGG       | CTGATGGACATCGAGGATGG        | 405 |
| LRRC32_e03_cds_a006_34-49   | LRRC32   | ATTATCCACCAGGCTCAGGC        | AGCAGAAACTGCTTGCGGAC        | 321 |
| KIF21B_e33_a001_0-100       | KIF21B   | AGCAGAGGCAGACCTCTCTGA       | GTTCTCTCCCTCATCACCTCC       | 285 |
| KIF21B_e31_a001_0-100       | KIF21B   | CAAAGATTGGGGAGAGTGGA        | CCTATTTGTTTTGGGGCAGA        | 260 |
| KIF21B_e29_a001_0-100       | KIF21B   | ATCTGTACCCAACACAGCCT        | CTAGTGGCTGACATCCCTCC        | 292 |
| KIF21B_e26_a001_0-100       | KIF21B   | GGTGAACCTGAATGGCTCAG        | GAATGTGGGTTGGAGTGGAG        | 278 |
| KIF21B_e09_a001_0-100       | KIF21B   | ATACTCTGGGGTGGATGTGCG       | AGCTCTGCTGCCTGACTGCT        | 308 |
| KIF21B_e06_a001_0-100       | KIF21B   | ACTGAGCTGTGTGGGTGCTG        | GAGGGCTGGGTGAGTCAGAG        | 250 |
| KIF21B_e02_a001_0-100       | KIF21B   | ATTGGATGCAGGGAGACCAA        | CCTTTTCTCTGGCTCATGG         | 395 |
| IRF8_e07_a002_0-91          | IRF8     | AGGGACCCTGTATGTCTCCC        | GACCTGGACCACCTCATCAC        | 416 |
| IRF8_e02_cds_a001_0-100     | IRF8     | GGGTTGCTGTGATGAATGAGA       | AGGGAAAGGAGACACTGTGC        | 289 |
| IL18R1_e06_a001_0-100       | IL18R1   | CAAAAATCAGAACTTTAGTTGCC     | TCAGCCACCCAGTGTTTTTTA       | 248 |
| IL18R1_e05_a001_0-100       | IL18R1   | GGTGCTTTCAACATCTGTGACC      | TGGAAGGCTCTATTATGTCCC       | 294 |
| ICOSLG_e04_a001_0-100       | ICOSLG   | TACCTCAGAGGCTCTCCCAAG       | CATCTCTCACAATCTGTTTCCC      | 399 |
| ICOSLG_e03_a001_0-100       | ICOSLG   | GTGAGGCTGGGATGGACCTA        | GAAAACAGATTTTGCACCTTTT      | 430 |
| GCKR_e09_a001_0-100         | GCKR     | GACCTCTGACCTCAATCCCA        | CCAAGGAAGTGGCAAGCAGT        | 283 |
| GCKR_e05_a001_0-100         | GCKR     | CCACCGACTAATCATCTCCA        | AGGTCAAACAAAATATTCATAGGCTAA | 285 |
| CARD9_e10_a001_0-100        | CARD9    | CCTCTGGGTGACTGCTGTC         | CTCTGAGAAGCTCTGTGCAGG       | 210 |
| CARD9_e05_a001_0-100        | CARD9    | ATGTAGGGGCTGCTCCTGTC        | CACCAGAGTGAGGAGAAGGG        | 492 |
| C1orf106_e08_a001_0-100     | C1orf106 | ATTCCTGCCACTGACCTGTCT       | CACCCTCCAACGATAAGCTC        | 270 |
| C1orf106_e06_a001_0-100     | C1orf106 | ATTTAGCACACAGAGGGTATTTCC    | CACTTAAATTCCACACCAGCAA      | 290 |
| C1orf106_e02_a001_0-100     | C1orf106 | TGCTCTCAAGCATCTATTCAGC      | GACTAGGGCAGGGGGATTTCT       | 266 |
| C11orf30_e21_cds_a001_0-100 | C11orf30 | CTTACCATAAAGATTCTCCTGTGTCT  | AGGGTTTCCCTGGACACTTG        | 292 |

|                           |          |                           |                         |     |
|---------------------------|----------|---------------------------|-------------------------|-----|
| C11orf30_e20_a002_40-96   | C11orf30 | GGAAGCTCAGATTGATACAAATG   | AATTTCTGCTGGACTCTCTTCA  | 301 |
| C11orf30_e19_a002_0-44    | C11orf30 | CTTATTTCACTTTACTTTGTGCCT  | TTTGTGCTGGAGCTGGTCTG    | 297 |
| C11orf30_e17_a001_0-100   | C11orf30 | GCTAATTCAAGCAGAGGCCA      | CCAGATGAGAGTAGAGCGCA    | 256 |
| C11orf30_e12_a001_0-100   | C11orf30 | CCTTAACTCAGGCCTCCTTTT     | TTGTGGCTTCTCAAGTCCT     | 269 |
| C11orf30_e03_a001_0-100   | C11orf30 | CCCTGAAGTTTCACTATACATAGCC | TGAACACCTCTGTTCTTCAACTT | 292 |
| C11orf30_e19_a003_70-100  | C11orf30 | CCTACCTTAATGGCACAGCC      | TGCCAGGAGAAAGCACTGAT    | 279 |
| CARD9_e08_a001_0-100      | CARD9    | AGGGGTTTGGTTAGGTTGGG      | GAGCCTCTGCTTGGAGTTGG    | 413 |
| GCKR_e03_a001_0-100       | GCKR     | ACCAGGTAACCAAGACCCAA      | GGGAAACAGAAAAGTTTAGGCA  | 281 |
| IL18R1_e01_cds_a001_0-100 | IL18R1   | AGCTTTGGCTGAATCTGTTTT     | TGCAAGTTTTTCACTCTGCTC   | 285 |
| KIF21B_e07_a001_0-100     | KIF21B   | ACTATTTTCCAGGAACCTCCC     | GCCAAAGAGGCAGGTACAGA    | 276 |
| KIF21B_e14_a001_0-100     | KIF21B   | CTCAGGGAAAAGGGAGGGTC      | ACATCTGCTCCCAATTTGC     | 309 |
| KIF21B_e17_a001_0-100     | KIF21B   | CAAAAGAGAAGGCAAGCAATG     | GTTTGGCTGCATGAGAATCA    | 277 |
| KIF21B_e18_a001_0-100     | KIF21B   | CTTCCCTCTTCTCACCCCTG      | GAGCAGCCTCTGTGTTCCCTG   | 421 |
| KIF21B_e30_a001_0-100     | KIF21B   | AACCAAGACCTGGGGACCTT      | GATTGTTTTGACCTCTGGCCT   | 272 |
| LRR32_e03_cds_a007_71-88  | LRR32    | GGAGATGCAGGTGAGGGAAT      | ACCTCAGCCTGGCTCACAAC    | 338 |
| LRR32_e03_cds_a008_9-30   | LRR32    | CTCAGGGACACCTCCTCCTG      | CTTTCTTCCAATCCTGGGCT    | 416 |
| LRRK2_e08_a001_0-100      | LRRK2    | CCATGGATGAGAATTCAGCTA     | AGGACAGAAAAGGCATTGAA    | 275 |
| MUC19_e15_a001_0-100      | MUC19    | TGCAGTTGAATACCTTTACACAAAT | TCCAAGAAGAGCATGGACA     | 300 |
| MUC19_e21_a001_0-100      | MUC19    | CCCAGAGGACTGAAGCTATCC     | TGAGAGCCATTTAAAGGAGAAT  | 291 |
| MUC19_e24_a001_0-100      | MUC19    | CCACGTGGACGTGTCTTAGG      | TCCTGTCTTCTGAGGTGCCA    | 354 |
| MUC19_e25_a001_0-100      | MUC19    | GCTGTAGCTCCTCTAGTCCCC     | AGCCTGAACCAAAAACCTCCC   | 281 |
| MUC19_e28_a001_0-100      | MUC19    | GTGAGGTCCAAAGGAAGCAC      | AGAGGAACCATTAATGTGGAACA | 283 |
| ORMDL3_e02_cds_a001_0-100 | ORMDL3   | TCCTCCTATCCCTCAGCCCT      | CTTGTTTGCAGAACAGCAGAGAG | 288 |
| P4HA2_e11_a001_0-100      | P4HA2    | CCCTGTGAGACCATCTAGCC      | GTAAGATGACCATCTGGATCTCG | 391 |
| PRDM1_e06_a005_58-85      | PRDM1    | ATCAACAACCTTTGGCCTCTTCC   | GAGCGAGAGTGGCCTGACAT    | 303 |
| PRDM1_e08_cds_a003_76-100 | PRDM1    | GAAACATGGGGAATGGACTC      | TGAAGCCCAAAGGGGTTAGA    | 279 |
| PTGER4_e02_cds_a004_51-93 | PTGER4   | TATGCGTCCAACGTGCTCTT      | CAAAAGAAGAGCTAGTTTTGCAC | 297 |
| PTGER4_e03_cds_a003_0-43  | PTGER4   | GATGAAATCTAAATGTGCGATCT   | TTGGTGATTGTCGGCTAAGAT   | 283 |
| PTPN22_e06_a002_0-100     | PTPN22   | GTGATTGCAAAGACAAGCTCTC    | GAAAAGGAGCTAGGGGCTTC    | 283 |
| PTPN22_e13_a004_53-87     | PTPN22   | CCTTGGTTTCTCTCTGCTGTATCA  | GGGGGTGGGTAAGACCTAGA    | 286 |
| PTPN22_e17_a001_0-100     | PTPN22   | CCTTTCCATTTAGGTCCTACTTT   |                         |     |
| SBNO2_e26_a001_0-100      | SBNO2    | AACAGTCTGGTAGGGGAGGG      |                         |     |
| SP110_e05_a001_0-100      | SP110    | GAGCTAAGCGGTATCAGCCC      |                         |     |

Supplementary Information for Rivas *et al.*

|                            |          |                             |                         |     |
|----------------------------|----------|-----------------------------|-------------------------|-----|
| SP110_e07_a001_0-100       | SP110    | GAAAGCAACTCTGAATTCACCC      | TCAAGACAGAGCCAGGGAAT    | 284 |
| SP110_e12_a001_0-100       | SP110    | CCAATTCAGCTGGTACCCAT        | TGAAGATTGTTAACCTATGAGGC | 283 |
| SP110_e15_cds_a001_0-100   | SP110    | GGAGGTGACTCAGAGCTTGG        | TGGGTTTGAGATCCAGTGTG    | 274 |
| SP110_e16_a001_0-100       | SP110    | ATCTGGAGGTGAGTGCTGTGT       | CTGGCACACAAAAATGATG     | 262 |
| SP140_e04_cds_a001_0-100   | SP140    | AAAGGAGGAAGCCTTCTCTGA       | AGTCAGCTCTCACACCCTGC    | 272 |
| LRR32_e03_cds_a009_0-15    | LRR32    | CCAATTCTGGCTTCCACAG         | GCCTCTACCTGCAGGGGAAT    | 504 |
| SP140_e28_cds_a001_0-100   | SP140    | GAGGAGCATTGTTTTGTCTTTAT     | TAGGGCTTCTGCATGGAGGT    | 541 |
| CARD9_e05_a002_0-100       | CARD9    | ACCTTCCAGGCACGGAGT          | GACCTTCTGCAGATTGACCA    | 506 |
| PTPN22_e13_a005_0-33       | PTPN22   | gagaagaagcagaggagaagagg     | TGCCTCTAATGTAAAGCACCAT  | 380 |
| SP110_e08_a001_0-100       | SP110    | ccctccacagctgacctac         | agtctctctcccctattactcc  | 306 |
| C11orf30_e10_a001_0-100    | C11orf30 | GTGTGACTACTGCCCTCTTGG       | tccaagtgtcaagcatattg    | 322 |
| LRRK2_e43_a001_0-100       | LRRK2    | CTTTGCAATGTCTGGACCTTTT      | tgctgggatggtgaaaat      | 355 |
| SP140_e03_a001_0-100       | SP140    | GTCTTTTGTAAACCATAAATCTCTAGC | GGCTTGAATCCCCAAAG       | 263 |
| SBNO2_e29_a004_0-100       | SBNO2    | ATGTTGGGCTTGTACACCGT        | GACGGGCAGGTGGTCTTCTA    | 360 |
| IL18R1_e10_cds_a001_0-100  | IL18R1   | TGTTCCCCCTTTCAAGTTATCTT     | AGTTCTTTTTGGCGTTCACTG   | 439 |
| IRF8_e03_a001_0-100        | IRF8     | GGCCATGAATTTAATGTGCTTC      | TCTGTGGTGAAGGCTACAGG    | 286 |
| KIF21B_e15_a001_0-100      | KIF21B   | ATTCTAAGAAGATGTCACAGGCACT   | CTGTATTTAGTGGGAGCCCTTAG | 318 |
| KIF21B_e32_a001_0-100      | KIF21B   | CGAGTCTACCCTCTCCCTTTT       | CACTTGGCCTCTCCCTACTG    | 241 |
| LRR32_e02_cds_a001_0-100   | LRR32    | gCAAGGTACATTCCCTTTTCT       | GGGCTTACAGTGTTCCTT      | 251 |
| LRR32_e03_cds_a001_47-62   | LRR32    | TTAAGTCAAGGAGCATCAGGCAG     | CCTGAACTTGCCAACAACC     | 305 |
| LRRK2_e18_a002_0-100       | LRRK2    | CAGTGTTTTTCACTTGCATCC       | GAGCAAAGACAAAAGTGAGGC   | 276 |
| MUC19_e11_a001_0-100       | MUC19    | CCCCGTCTTCTAAGTCCTC         | AGGAAATCTGCCCAAGTTAATTC | 289 |
| MUC19_e20_a001_0-100       | MUC19    | CAGGATCAGCCAGAATTTGC        | TATCATGAACGAGGGCCTTT    | 274 |
| P4HA2_e16_a001_0-100       | P4HA2    | ACATTACATGGCTGGATGGTAA      | GAATGTGTTCTGAAAGGCCA    | 290 |
| PRDM1_e05_a001_0-100       | PRDM1    | TCCTTTTACATGCCTGTCTTCT      | ACCGACATTACTGGCATTTTT   | 334 |
| PTGER4_e02_cds_a002_24-58  | PTGER4   | TTGGGCACTTTGTTGGTGAG        | CACCAGGTGTCTGGGTACTGC   | 311 |
| PTGER4_e02_cds_a003_70-100 | PTGER4   | CTCTGCAACGTGCTTGTGTG        | GAGAAAAAGGCCGAGTAGGG    | 307 |
| SBNO2_e06_a001_0-100       | SBNO2    | ACTGAGACCTCACTGGACCGT       | GTCTCCCGTACCACCCTCAC    | 292 |
| SP140_e08_a001_0-100       | SP140    | CCCAGGGAGCAGTTCTACAC        | GGAATGGGAAGGGAGATGAA    | 260 |
| KIF21B_e08_a001_0-100      | KIF21B   | TAGCTCCAAGGGGAGTGCTG        | CACCCTCACAAACAGCCTTTCT  | 271 |
| LRR32_e03_cds_a002_22-41   | LRR32    | GTTCTCGGCAAGATTGAGCC        | CCCATACACCTTTGCCAAT     | 368 |
| LRRK2_e40_a001_0-100       | LRRK2    | GTTGAATTACTCTTACATGATTTTG   | CTCAGAACCTGAGAGCAAGTCT  | 297 |
| PRDM1_e08_cds_a001_0-45    | PRDM1    | TTCCCTGCTGTCTCTCTCCC        | GTCAGATCTTCCAAGGGCAG    | 300 |

|                             |          |                             |                            |     |
|-----------------------------|----------|-----------------------------|----------------------------|-----|
| PTPN22_e02_a001_0-100       | PTPN22   | CCAAGATCAGGATCAGTAAGCAA     | TGCCAGTGGAAAAGGAAAGC       | 288 |
| SBNO2_e25_a001_0-100        | SBNO2    | ACACAACCGGCCTACAAAGC        | CTAGGAGTCTAGGGGAGGGCAG     | 332 |
| SP110_e09_a001_0-100        | SP110    | CCTGCTTCAGGAGAGACCCT        | TTGGGACTGTAGGAGGCTCA       | 281 |
| SP110_e10_a001_0-100        | SP110    | gCCTCAGTGTAAGACAGCTCTGA     | AGGAGGGTAAGACCTGGAGC       | 278 |
| SP140_e07_a001_0-100        | SP140    | CAGGAGCATCCTGAGGTCTG        | ACACACCTGGGGAAAACAAC       | 282 |
| SP140_e10_a001_0-100        | SP140    | AAAGAGGAGCTGCAACAAGG        | TCCATGCCAACTAGAAAACAA      | 288 |
| SP140_e19_a001_0-100        | SP140    | CAGCTGCTCATAAATGACTGTGA     | TTTCCTTGACACATTTTGGAA      | 286 |
| C11orf30_e02_cds_a001_0-100 | C11orf30 | AGGGAGGACAAGCTCTTTGG        | GTAGCCCTCAATAAATCTTAGCTACT | 342 |
| CARD9_e12_a002_0-100        | CARD9    | TGAAGACAGGTGTCTCAGGC        | GTGAGAAGGACGGGTTCCCT       | 216 |
| KIF21B_e03_a001_0-100       | KIF21B   | ATGGTCCTGTTGTCCACCAA        | CAGGGTTACACCCTCCTATCT      | 271 |
| LRRC32_e03_cds_a003_83-99   | LRRC32   | TACAGGCTGTTCCAGACAGG        | GAAGGTCTCGTGCCAGGTTC       | 318 |
| MUC19_e13_a001_0-100        | MUC19    | GCAACACATCTAAACCTGGGA       | AAAAGTGAGCAGGTTAGGAAGC     | 270 |
| PTGER4_e03_cds_a001_63-100  | PTGER4   | GAATTTGCTTCCAGGTGTGC        | CAGGATTTTATAAGGGTCCAGAAA   | 282 |
| SP140_e02_a001_0-100        | SP140    | CCACCACAAACCTCTTGGAA        | TGGCATAATTGAGTATGGACCTG    | 290 |
| SP140_e09_a001_0-100        | SP140    | ACACTCTCAGAGATGCCTTTTT      | AGAAGCTCTTGTGCAATCCA       | 308 |
| C11orf30_e06_a001_0-100     | C11orf30 | GCCTGGACAGTTTTGGTGAA        | TCCAGGAAGGCAGGTCTAATC      | 287 |
| C1orf106_e07_a001_0-100     | C1orf106 | TGGCCTTACCAGGTTTCTTT        | ATAGCTCCCACCGACTCCCT       | 300 |
| CARD9_e09_a001_0-100        | CARD9    | AGGACCCCAGGTGAAGGAAG        | CTAGCAGGTTGTTCTGGGCAT      | 245 |
| GCKR_e02_a001_0-100         | GCKR     | CTTCCTGCTCCATCCTTGTC        | CGATATTAGGAGCCATGGTGA      | 280 |
| GCKR_e16_a001_0-100         | GCKR     | GCCTCTCCTGCTCCTCTTTC        | CTGGTAACCCATGACCTTGC       | 263 |
| KIF21B_e24_a002_0-100       | KIF21B   | ACCTCAGAAGGAATGGGCTG        | AGGATCCTGAACTCTCTCTGC      | 290 |
| LRRK2_e25_a001_0-100        | LRRK2    | GCTGTTCTTTGAAAGCAAATTGT     | TAGAGGGCCTGGTAAGGAGG       | 282 |
| LRRK2_e28_a001_0-100        | LRRK2    | CCAACAGGTTTTGCCCTTTT        | TCCATCAAAGTCACAGAGAGTAGA   | 287 |
| PTPN22_e05_a001_0-100       | PTPN22   | CTCTGAGAATCACGTGGCAT        | TTTCTGAGTCTGGGATCCAT       | 273 |
| PTPN22_e07_a001_0-100       | PTPN22   | CAAAGACCCTACCACTTCCCA       | TGGCCCTTTCTCTGTATCCTGT     | 301 |
| SP140_e14_a001_0-100        | SP140    | GCAGCACTGGAAACTCTTCTG       | TCTCCTTTCACTGCTCCTCC       | 274 |
| C11orf30_e04_a001_0-100     | C11orf30 | GCAATCTTGTCCCCCTTCTC        | TCAGGAATCTGCTACACAATAGG    | 274 |
| C11orf30_e16_a001_0-100     | C11orf30 | GTGGACAACCTCTGGTTTTGGT      | TCCCATGAAATCCAGGAAGG       | 286 |
| C1orf106_e09_a001_52-100    | C1orf106 | TACGTGGTGGTGGCTGAGAG        | CCAACAAAACAGCCCTCCTG       | 389 |
| CARD9_e07_a001_0-100        | CARD9    | aaagattaaaaTCCTCTGACAACCTGC | GTATACCCCAAGGGCCAGAAT      | 289 |
| GCKR_e18_a001_0-100         | GCKR     | TTCTTAGTTCCTCTGGCCTTTAG     | TGGAGGTCCTTGTGAGCAGA       | 308 |
| IRF8_e04_a001_0-100         | IRF8     | CCCAAACCAATGAAGACACTC       | ACATGAGACTCCTCCTGGCA       | 273 |
| KIF21B_e05_a001_0-100       | KIF21B   | TCAATCTGGTTTGCTATTTCTGA     | CCAAGCCCTCACTTCTGCTT       | 266 |

Supplementary Information for Rivas *et al.*

|                           |          |                            |                           |     |
|---------------------------|----------|----------------------------|---------------------------|-----|
| KIF21B_e10_a001_0-100     | KIF21B   | TCTCTAGAAGCTTAGTCCTGCAC    | gcgcTGGCCTATTTATCTTCT     | 244 |
| KIF21B_e21_a002_0-100     | KIF21B   | CATCTGTGCCCATAGAGCCC       | GAGACCAAGGTATCCGCAGG      | 251 |
| MUC19_e14_a001_0-100      | MUC19    | GGAACAAGCTATCCCTGAAAA      | GTACCATTGCTGCAGTTAGCC     | 258 |
| P4HA2_e04_a001_0-100      | P4HA2    | GATGGCTTCCTTGTTCCCTTG      | CTTATCCCAGGGGACTTGCT      | 275 |
| PRDM1_e05_a002_0-11       | PRDM1    | TCCCGAACATGAAAAGACGA       | CCGTCAATGAAGTGGTGAAG      | 282 |
| PRDM1_e06_a003_16-45      | PRDM1    | AAAAGGACCTCGATGACTTTAGAAGA | GGTAGGAGCCCAAACCTTCC      | 339 |
| PTGER4_e03_cds_a002_29-80 | PTGER4   | ATCAAATGCCTCTTCTGCCG       | CCAGTAAGACACTCTCTGAGTCC   | 331 |
| PTPN22_e09_a001_0-100     | PTPN22   | AATGGGAAGTGCCTGCTGAG       | TTGCCTAGGACCTCTTGCAT      | 273 |
| SBNO2_e08_a001_0-100      | SBNO2    | AAAAGGGTTTGAACCTGTCCC      | CTGGCCTAGAAGCTGGGAGT      | 360 |
| SBNO2_e20_a001_0-100      | SBNO2    | AGACGCAGAGTGACCAGCAG       | GAAGGCAGCCAACATGTCTT      | 325 |
| SP140_e05_a001_0-100      | SP140    | CTGAGGTCTCTCCTCTGGTCA      | GCAGGTACATGGCTGTGTGA      | 283 |
| SP140_e27_a001_0-100      | SP140    | TGGGAATCCACAGAAGGTAGA      | TTTCTTGGCACCAGAAAATG      | 279 |
| SP140_e25_a001_0-100      | SP140    | AGACCCCATGTGTGAATCTTG      | GAAAGGAGAAGGCTTGGGGTT     | 301 |
| SP140_e22_a001_0-100      | SP140    | GACAGGGAGATGGTTTCTCATT     | ACCCAATTTTACAGACCCATA     | 284 |
| SP140_e18_a001_0-100      | SP140    | AGTCGACACTCCCAAAAGCA       | ATTGACCTGTAGGGCAAAGG      | 276 |
| SP140_e13_a001_0-100      | SP140    | GGACAGCCCTACCTGAGAGAT      | GCTCCAAATTCAACCTCCTG      | 260 |
| SP140_e11_a001_0-100      | SP140    | TGAACCCACCTACAGAACCC       | CCAAATTCAACCTCCTGACA      | 279 |
| SP140_e06_a001_0-100      | SP140    | CCTCAGGTCAGTTGTTTGG        | GAATTCCACCTCCTGACACC      | 275 |
| SP110_e18_a001_0-100      | SP110    | GCATTTTATGCAAGAGAACCG      | AAACAAAATCCCACACACCC      | 261 |
| SP110_e04_a001_0-100      | SP110    | ATATACAGGTGTTGGATGGGAT     | GGTACTGATGTGTGTCCCTTCA    | 332 |
| SP110_e02_cds_a001_0-100  | SP110    | AATCAGGCATATTGGTGGGG       | cccagccTTTGCTTCTATTTTT    | 245 |
| SBNO2_e23_a002_0-100      | SBNO2    | AAAGCTTTGGAGAGCCTTCT       | CATCCAGCAGTTCGGTGAGT      | 289 |
| SBNO2_e19_a001_0-100      | SBNO2    | TGGAATCCTGACCCACAGGT       | GTCTCCTCCACCTGCTCCTC      | 305 |
| SBNO2_e12_a001_0-100      | SBNO2    | GTAGTGAGCTCCAGTGGCCT       | CCATTCCACACCTGTTCTGT      | 350 |
| SBNO2_e05_cds_a001_0-100  | SBNO2    | ACTGCCAGAAGAGACGGACG       | GACTAAACCGACATGCAAATG     | 368 |
| PTPN22_e13_a002_76-100    | PTPN22   | TCTGCCATTTTATGTTTGTG       | ATTGTGATGCTAGGAAGCGG      | 269 |
| PTPN22_e12_a001_0-100     | PTPN22   | CATTTTTGCTGCTTTTGTGGT      | GCTTCACTGAAAACCAGCCT      | 275 |
| PRDM1_e08_cds_a002_35-85  | PRDM1    | CATCTCTGTAGCCTCAAGTTC      | CATGAGGGGTAGATCTGATGAC    | 309 |
| TNFSF4_e03_cds_a001_0-100 | TNFSF4   | GGTGCCTGGTTTTAGATATTGC     | AGGAATTAATTAACAATTTTCCCCT | 420 |
| TNFSF4_e01_cds_a001_0-100 | TNFSF4   | ATGAGCTGGTGGGAAAACAG       | CTTCTTTCTGGGGAAAACCTCA    | 274 |
| SP110_e14_a002_0-100      | SP110    | CCTGTACCTATCTGTCCCCG       | AGTCTCTTTGACCTGGAAAGG     | 281 |
| GCKR_e14_a002_0-100       | GCKR     | tttagtctcaagtctgtgcttTA    | CCCAGAAAAACAACAGCTCC      | 242 |
| C11orf30_e09_a002_0-100   | C11orf30 | TTTGCTTTCCTATCAAATTCTCTT   | accgtgttcattgactggaag     | 381 |

|                          |          |                                  |                               |     |
|--------------------------|----------|----------------------------------|-------------------------------|-----|
| C11orf30_e08_a003_0-100  | C11orf30 | GTTGTATATTCTCTGTTGAATTGCTT       | ACCTTCATATCCAAAGCAGAGAAA      | 505 |
| C11orf30_e13_a003_0-100  | C11orf30 | TTTTCATCATCCTGGTAAAACC           | TTTCCTTCAAATTTCTACCCG         | 355 |
| C11orf30_e15_a003_0-100  | C11orf30 | GGGGAGATAAAGCATGAAGTTTACAA<br>T  | CTCTAGAGAAAACATGCTTCATTCA     | 340 |
| C11orf30_e20_a006_0-55   | C11orf30 | CTGGGGTGTGGATTAGATTTT            | AATGATCCTGCTTCACCAGT          | 356 |
| CREM_e04_a002_0-100      | CREM     | GTCAGAAATGATTATTAGAAAAGCTAG<br>G | TTGACTTTCAACGGTGCCTG          | 589 |
| CREM_e09_a002_0-100      | CREM     | GCAATGGTAATAAATAGACCCAGAGT<br>A  | AAAAACTATAAAATCACCCTCAATG     | 368 |
| CREM_e13_a002_0-100      | CREM     | CAAAAGTATATCATTTCAGATCAGT        | AAAAAGTGTCTAGAAAGTTACCGA      | 290 |
| CUL2_e05_a002_0-100      | CUL2     | GCCAAATCAGTGTCTTAAAAA            | TTTGCTTTCCTACTGACTTTAACTT     | 257 |
| CUL2_e11_a002_0-100      | CUL2     | CCATGTCTACATCAGAAACCTCATAC       | TCCTTGAACCTCTTAAAATGTGG       | 261 |
| CUL2_e12_a002_0-100      | CUL2     | GCATTCCCTACATAAATGCCAA           | GGCTGGTGGTTAATTATGGC          | 255 |
| CUL2_e13_a003_0-100      | CUL2     | GCCAGCATTCTTGCCTAGAAC            | AGAAGCACCCCTTTGTAAGATTTATT    | 295 |
| CUL2_e17_a002_0-100      | CUL2     | GGTTGATGGAGGAGAAAAGGTT           | TGAATGGTTTTTCATTGCTTTTTG      | 277 |
| CUL2_e19_a002_0-100      | CUL2     | CCAATGCTTAAATGTTTCCC             | AGTTATGAGAGTGGAGGCTTTTT       | 272 |
| FASLG_e04_cds_a002_0-100 | FASLG    | GGCCACAGTTTTGCCTTAG              | TGCCTGTAACAAAGAATCATAATGG     | 524 |
| ICOSLG_e06_a003_0-100    | ICOSLG   | TTTTTGAAACTCTGAAAGACAGC          | TCCAAGTAGGGTGTTTAGGGG         | 220 |
| IL18R1_e04_a003_0-100    | IL18R1   | GGAATTGCTACTTTCCATTCTTTTT        | TGGACTCTCAATTCCTACACAGTTT     | 373 |
| LRRK2_e05_a003_0-100     | LRRK2    | GGGTCTACAAACCATTACAGTCT          | TTATAACTGTGTTCTACTTTTCCAGT    | 325 |
| LRRK2_e09_a004_0-100     | LRRK2    | GGCTTCTCCTAAAGCACACCTC           | AGGAGATTATTTAGTGCCAGCAT       | 387 |
| LRRK2_e14_a003_0-100     | LRRK2    | AATTTCTCACCATCGTAATTTTT          | TGACTTCCTCCTATCATAGCAA        | 498 |
| LRRK2_e21_a003_0-100     | LRRK2    | AGATTTTACAAAGGGAATGGACT          | ACACAACATAATCACAATTGCAC       | 298 |
| LRRK2_e24_a003_0-100     | LRRK2    | GGTGTGTAAGGCAGAAATATTAGC         | TCATTGCTATAAAAATGTCAGCATA     | 414 |
| LRRK2_e29_a003_0-100     | LRRK2    | TCTCTAGCAAAAATATGCATTAACAG       | AGCTCAGTTTTTGAATCCCTG         | 481 |
| LRRK2_e42_a003_0-100     | LRRK2    | GCCTAAGTGTATGCCTCCTTGG           | TTTAAGGAATTAAGCATACAACACTACAA | 339 |
| LRRK2_e44_a003_0-100     | LRRK2    | GGTTCCAGTTTAAACAGTTTTAGGTT<br>T  | TGAATAATAATCCTACATTGGCTCTTA   | 424 |
| LRRK2_e45_a003_0-100     | LRRK2    | AAGTAATGCAAGAAAGCAAAAAG          | TGCACACAATTCAGTCGTTTA         | 374 |
| LRRK2_e46_a003_0-100     | LRRK2    | ggaggagaacattaaggcca             | tgattctgctctcaggagtt          | 253 |
| LRRK2_e47_a003_0-100     | LRRK2    | TGGAGTTTTGTTCTGTGGATACT          | ACCCTTCTGCTTTCTGGAATTTT       | 426 |
| MUC19_e33_a003_0-100     | MUC19    | CCTTGACTCCTTGTTGAAAAAT           | AGCTTACATTTCTCTCTATGCAGAAC    | 300 |
| PRDM1_e03_a003_0-100     | PRDM1    | AGCTTGTTAATTATGTAGGCATCA         | AGCCACCCAGCTCTTTTAGC          | 349 |
| PRDM1_e06_a007_0-20      | PRDM1    | GGCAGTTTTGCTTCAGTTCTCTC          | TAAACGACCCGAGGGTAGAA          | 293 |

Supplementary Information for Rivas *et al.*

|                                     |          |                            |                             |     |
|-------------------------------------|----------|----------------------------|-----------------------------|-----|
| PTPN22_e14_a003_0-100               | PTPN22   | ctcaaggctcacacatcagc       | TGAATGAACAAGTGTCAACTTTACTG  | 336 |
| PTPN22_e18_a003_0-100               | PTPN22   | CGGCATGTTTTCCCAAACTC       | AGAATACATTTTAAAAGCCCCTAAT   | 285 |
| SBNO2_e17_a003_0-100                | SBNO2    | CATGTCCCAAACCTTCCAGG       | AGCTCACCATCCCGAGACAG        | 526 |
| SP110_e03_a003_0-100                | SP110    | GTGCATATTCCACAGGGCTA       | GCTTTCTTAAACTTAGAAAACCATAA  | 344 |
| SP140_e15_a003_0-100                | SP140    | AAAATAGAGTCACTGGGTCAAAGT   | GTCAAGCAAATGCGGAGAAT        | 290 |
| SP140_e20_a003_0-100                | SP140    | TGAAACTCTAGAGGGTTTTGGAA    | CCTTCAGATAGGAGCTGCAAA       | 277 |
| TNFSF4_e02_a002_0-100               | TNFSF4   | CCTTCCCTTAGGAAAAGAAGAG     | AGGCTACTGCATTTCTGCTTCA      | 255 |
| TRIB1_e02_a002_0-100                | TRIB1    | AACTTCTGTTCAGCTCCCTCAG     | CCAACACACAGCACCTAACTAC      | 459 |
| CDKAL1_e12_a001_43-100              | CDKAL1   | CAAGAAACAGTGAAACTTGTTGA    | TGAGCAAGTTGTGTGAAGGTAG      | 200 |
| CrohnsManual_MAST3_e21_a002_45-100  | MAST3    | ACAATGCCCAAGTTTGCCTT       | CTCTCTTAAAGCCTTTGTTGGC      | 266 |
| CrohnsManual_MAST3_e13_a002_53-100  | MAST3    | TTTGTGGAGCGTGACATTCT       | GAACAGACCTCAACTTGGTCTAAAAAT | 201 |
| CrohnsManual_MAST3_e20_a001_0-100   | MAST3    | cggcTTACCATTCTTTTGTC       | GAAGCTGGATCTGCCTACACTTC     | 202 |
| CrohnsManual_MAST3_e12_a001_0-100   | MAST3    | ACAGGGGAGGAGGTAGCATC       | GAAATGGGTCTATGCAGGACT       | 230 |
| CrohnsManual_MAST3_e07_a001_0-100   | MAST3    | TCAGGTCCCATATCACAAGCC      | GACATAGCCAGGAAGACAGAGTTC    | 201 |
| CrohnsManual_MAST3_e05_a001_0-100   | MAST3    | TTCTTCCATCTGTTCTTGTTT      | cacaaCTATCCAACACCTTGAA      | 207 |
| CrohnsManual_MAST3_e02_a001_0-100   | MAST3    | TAGTCTCTCTGAGAATGATCCCAT   | GGCAAGAATGAACATGAGATG       | 201 |
| Manual_UBE2L3_e05_a003_3-100        | UBE2L3   | TGGCAGTAATCCAGTCCCTC       | ACGGGGTCTCTGCTCACACT        | 205 |
| Manual_UBE2L3_e05_a002_0-99         | UBE2L3   | GCCTGTGCCATTTCTGAGACT      | TGGCAGATTTTAGTCCACAGGTC     | 221 |
| Manual_UBE2L3_e04_a002_0-100        | UBE2L3   | CCAGCGCTCTTCTTTGTCT        | GCATCTTTTCATATACTATTTCTTCC  | 212 |
| Manual_UBE2L3_e03_a003_51-100       | UBE2L3   | TTTAAACAAAGATCTATCACCCAA   | GTACCTGAAAGATTCTCTGGATTC    | 211 |
| Manual_UBE2L3_e03_a002_0-82         | UBE2L3   | CCTGTCTTGGCCATAGGTTTAT     | TTCCAGTTTTCGGCACTAAT        | 226 |
| CrohnsManual_C10orf22_e01_a001_0-19 | C10orf22 | TATTTTCCAATCAACAACTGAACTAT | CTTCAGCTTGCTCAGGTTCTC       | 589 |
| CrohnsManual_ZGPAT_e04_a001_0-100   | ZGPAT    | CACCATGCACAATCCTCTGG       | GACCCTGGGAATCTGAGGAG        | 438 |
| CrohnsManual_ZGPAT_e05_a00          | ZGPAT    | GGAATGTGTTTGACTTCCTCAATG   | CTCCTGGATGCTCCTGATGTC       | 200 |

|                                      |           |                                  |                             |  |     |
|--------------------------------------|-----------|----------------------------------|-----------------------------|--|-----|
| 3_48-92                              |           |                                  |                             |  |     |
| CrohnsManual_ZGPAT_e05_a001_0-46     | ZGPAT     | CTCCTCAGATTCCCAGGGTC             | AAACACATTCCGAGGAGCTG        |  | 347 |
| CDKAL1_e05_a001_0-100                | CDKAL1    | GCCACTGGATATTTTTGAATGATTAA<br>G  | TCTTTTGGTATCAATTCTTACTTTGAT |  | 213 |
| CDKAL1_e13_a001_0-100                | CDKAL1    | CTGCTGTCAACTCAATTGTTTGTATGT      | ACCATATGTTGGTGAAAATTGTACT   |  | 200 |
| CDKAL1_e04_a001_0-100                | CDKAL1    | aaaaTCACTCAATGAACTTACTTTTT       | ACCCTTTAACTGCTAGGCTATTTAT   |  | 246 |
| CDKAL1_e10_a001_0-100                | CDKAL1    | GCCACAGATTTGTTAATTATCTCTT        | TTAGCATGCAAATAGGGTGC        |  | 233 |
| CDKAL1_e16_cds_a002_0-64             | CDKAL1    | GATTGATATCACAAACAGGGCTT          | ACATCCTCAGCGCACAGTCTT       |  | 201 |
| CDKAL1_e15_a001_0-100                | CDKAL1    | tgcaataattctataaatctgaaactg      | AGCTGCTGTTTTACTAGCAGGGTAGA  |  | 297 |
| CDKAL1_e07_a001_0-100                | CDKAL1    | AATGTGTAACATTGACTCAAGCAT         | AAAGGTGCCTGGCAAGAGTT        |  | 229 |
| CDKAL1_e11_a001_0-100                | CDKAL1    | AAATGATTAGTGTTTTCTCCTTCC         | TGCCACAAGCTTTTGAAAGAAA      |  | 241 |
| CDKAL1_e16_cds_a001_43-100           | CDKAL1    | GCGAGTTCAGAATGGTGCT              | TGGAGATGTCGCTTTCCTGTT       |  | 200 |
| JAK2_e23_a001_0-100                  | JAK2      | GATGGCCCTTAGTGTTTCATTTAATTT      | TGTTCTGTAAATCTACTTTGGTCTCAG |  | 200 |
| JAK2_e19_a001_0-100                  | JAK2      | GGCAGAGTAAAACATTATTTCCACCT<br>T  | ACGGTTGCTTCATCTACAGC        |  | 205 |
| JAK2_e12_a001_0-100                  | JAK2      | GGCAGAGAGAATTTTCTGAACTATTT<br>A  | TGCTCTGAGAAAGGCATTAGAAAG    |  | 203 |
| JAK2_e08_a001_0-100                  | JAK2      | TGTTTTAGATGACACTTGGTCATAAT       | TGGAGAGGAAATTAATGAACTAAATA  |  | 246 |
| JAK2_e06_a001_0-100                  | JAK2      | GGCTCTGTAAATTCTACCCGTTTTTA       | TTTCTGAGAACTATAAAATGAAACCAT |  | 220 |
| JAK2_e03_a001_0-100                  | JAK2      | GGAAGCTGACCAAATGTTTTTAT          | TGTAAAGTTTTTCTGATTAAGTGAC   |  | 238 |
| JAK2_e02_a001_0-100                  | JAK2      | ACCTTTAATAATTCCTTCTCTGCT         | TGCCTTTTAGCATTAAAGTGAGTTAC  |  | 201 |
| LOC441108_e03_a001_0-100             | LOC441108 | TGTCTGAATCTAGAATAACAGGAAGA       | GTGGCAGCACACCTCACAAAC       |  | 570 |
| CrohnsManual_ZNF365_e02_a001_0-86    | ZNF365    | gtgaatTCCTTGCCTTATATTTCC         | ATCACGGACAAAGCCAGAGG        |  | 220 |
| CrohnsManual_IL18RAP_e03_a002_29-100 | IL18RAP   | GTTAAGCCCCAGACAAATGC             | AGCCCATGAAGAAGATACCATAAAAAC |  | 205 |
| CrohnsManual_IL18RAP_e03_a001_0-82   | IL18RAP   | CTAGACAAAATATCTATGTTTCACAGG<br>A | TTTGTGCATCACTTTGGCAG        |  | 205 |
| CrohnsManual_IL18RAP_e07_a001_0-100  | IL18RAP   | TGTTACTGAATGGAGTGGTATTTTT        | TCTGGGCTTACCTCCTCTCTTT      |  | 201 |
| CrohnsManual_IL18RAP_e04_a001_0-100  | IL18RAP   | GTGGCAAATTTATCTGCTTAAAATATC      | AAATCTCACTTACCAATGGTTCTC    |  | 202 |
| CrohnsManual_ZNF365_e08_a00          | ZNF365    | TGGAAGAAAGAGCATTCCATC            | ACCCCTCAACCCTACTCTCAG       |  | 200 |



Supplementary Information for Rivas *et al.*

|                                |         |                            |                             |  |     |
|--------------------------------|---------|----------------------------|-----------------------------|--|-----|
| 1_0-100                        |         |                            |                             |  |     |
| CrohnsManual_ZNF365_e06_a00    | ZNF365  | GGCAGCACATAAGTGAAGAGTT     | ATCCAAGTCCTCATCCAGAATCA     |  | 200 |
| 1_0-100                        |         |                            |                             |  |     |
| CrohnsManual_NCF4_e04_a001     | NCF4    | AGGCTCCTAGGACAGCTCTTTGT    | CCCAGTTCCCAAAGCCATAC        |  | 200 |
| 1_0-100                        |         |                            |                             |  |     |
| CrohnsManual_ZNF365_e12_a00    | ZNF365  | CACAGGCTCTGTGTTTCATCTC     | tgacaGTAGGGTAGAGGAAGTGGAC   |  | 201 |
| 1_0-100                        |         |                            |                             |  |     |
| CrohnsManual_IL18RAP_e01_a0    | IL18RAP | CTCAGGGCAGAGTTCTGAAT       | TGACCACAGACTCACAGTGCTAAC    |  | 201 |
| 01_0-100                       |         |                            |                             |  |     |
| CrohnsManual_NCF4_e06_a001     | NCF4    | ATTTTCAGCATCTTCTGTCTCCT    | CAGATGCCACAGTGTGAGAG        |  | 231 |
| 1_0-100                        |         |                            |                             |  |     |
| CrohnsManual_IL18RAP_e06_a0    | IL18RAP | CACCAGCTTCCTTCTTGTCTTCT    | TGCAGAGAACAGAATCCGTGAG      |  | 200 |
| 01_0-100                       |         |                            |                             |  |     |
| CrohnsManual_MAST3_e26_a00     | MAST3   | GTTCTGAAGCCTCCGGTTTT       | CTACATCGTGTCATTCCATCCC      |  | 316 |
| 1_0-100                        |         |                            |                             |  |     |
| CrohnsManual_MAST3_e22_a00     | MAST3   | ATGGTGAGTTTGAGGGGCAC       | CAGACAAAGGTGAGAGGGGC        |  | 305 |
| 1_0-100                        |         |                            |                             |  |     |
| CrohnsManual_MAST3_e14_a00     | MAST3   | gccTCATGACTACATCCGCC       | CTCTGCCCTGATCCTCTTTG        |  | 254 |
| 1_0-100                        |         |                            |                             |  |     |
| CrohnsManual_MAST3_e10_a00     | MAST3   | GTGCTATTGGGCTAGCGTGG       | CCTTGGTTTCCTCTTCCCAT        |  | 318 |
| 1_0-100                        |         |                            |                             |  |     |
| Manual_IL12B_e03_a001_0-82     | IL12B   | ttCCTTATGGAGCACATATAATCATC | GGAGCTGCTACACTCTCTGC        |  | 223 |
| Manual_IL12B_e02_a001_0-100    | IL12B   | CCAAGGAATATACTGCACCTGAAT   | AGCCTTATTAGGAAAATAAAGCATGT  |  | 234 |
| Manual_IL12B_e06_a001_0-100    | IL12B   | GGGGCCTCCACAGAGAATAAT      | CAAAGGTAACAAGAATTATTGACATTC |  | 223 |
| Manual_IL12B_e04_a001_0-100    | IL12B   | ATGCTGAGAAACCAGAGCAG       | ACAATCAAAACCTTTCTGCAA       |  | 210 |
| Manual_ATG16L1_e05_a002_38-100 | ATG16L1 | CCAGACCCTGAAGGATGAATATG    | AGGATGGAAACCACTAACTGTG      |  | 201 |
| Manual_ATG16L1_e05_a001_0-62   | ATG16L1 | AGGTACTATTCGTCCTCTGATGTC   | TTCCGTAGTTTTCTCAGTTTTCC     |  | 200 |
| Manual_ATG16L1_e17_a001_0-100  | ATG16L1 | AATTGACAACCTTTCTTTTCTTACTG | CCTGAGATGAAGTCAAAGGC        |  | 202 |
| Manual_ATG16L1_e12_a001_0-100  | ATG16L1 | GGCTAAAATTGGTTTTCTCTTC     | AAAGTCCCCTAATTAAGCACCTG     |  | 200 |
| Manual_ATG16L1_e06_a001_0-100  | ATG16L1 | GCTTCTAGAGAGCCCAAACCC      | ACTTTTAAGAGAGCCAAATTTTCAG   |  | 200 |
| Manual_ATG16L1_e15_a001_0-     | ATG16L1 | GGCCTACGTTACATTTCTCAGAT    | TCTTCATGCAACCAGCACAT        |  | 219 |

|                               |         |                             |                             |     |
|-------------------------------|---------|-----------------------------|-----------------------------|-----|
| 100                           |         |                             |                             |     |
| Manual_ATG16L1_e16_a001_0-100 | ATG16L1 | CTGAGCTCCCTCAGTGACAGT       | GAAACATAGGTTGGGCACTGAAC     | 200 |
| Manual_ATG16L1_e14_a001_0-100 | ATG16L1 | GGGTGGCAGCATTATGTAAACAG     | GTGCCTCCAGTCAGGAGCTT        | 207 |
| Manual_ATG16L1_e09_a001_0-100 | ATG16L1 | TGAGCAGTAAACCTCTGCAATCC     | CCATATCAAGCGTGGTAGGGTT      | 200 |
| Manual_ATG16L1_e13_a001_0-100 | ATG16L1 | TGTGGATACTTTGCCAGCAT        | CATCTAAGCATATACACAGACAGAGAG | 234 |
| Manual_ATG16L1_e08_a001_0-100 | ATG16L1 | AGTGGGAAACATATTCCCAGTTAC    | CTTATACACATTTAAAAAGGAAAGGTC | 200 |
| Manual_ATG16L1_e04_a001_0-100 | ATG16L1 | CGCCACCCACTGTGTAGTTTC       | AGCAGAACAAAGGACATGGGA       | 209 |
| Manual_ATG16L1_e02_a001_0-100 | ATG16L1 | GGTACCTAGCAAGTGTACATACGTT   | TGAGATAAATTTCTTAGAGGAGACA   | 213 |
| Manual_NOD2_e04_a014_91-100   | NOD2    | CACCTCAAGTTGACATTTTGC       | CATACCTGAACAGCAATGCC        | 200 |
| Manual_NOD2_e04_a011_69-84    | NOD2    | ACACCTCTTCAATTGTGGCA        | GGATGGAGTGGAAAGTGCTTG       | 287 |
| Manual_NOD2_e04_a005_27-37    | NOD2    | TTAACCTTTGATGGCTTTGACGA     | GAACTCGGTGCGGATGTACT        | 201 |
| Manual_NOD2_e04_a004_18-31    | NOD2    | AATTTCTCTTTGTCTTCCCATTGAG   | GTCTGGACAGAGGTGGGGTC        | 244 |
| Manual_NOD2_e04_a002_6-18     | NOD2    | TGGAGGACATATACACAGAGAATG    | CAAAGAGAAATTCCTGGAAGTCTTG   | 240 |
| Manual_NOD2_e11_a001_0-100    | NOD2    | CCTTGAAGCTCACCATTGTATC      | TCAGATCCTTCACATGCAGA        | 268 |
| Manual_NOD2_e09_a001_0-100    | NOD2    | AGAGCACCACGAATTTTGCC        | CTTCCCCAGAGCAGAGAATCC       | 206 |
| Manual_NOD2_e08_a001_0-100    | NOD2    | AGGGAGGAGGACTGTTAGTTCATGT   | CAAGAAAAGTGCAGGATAGACTC     | 200 |
| Manual_NOD2_e06_a001_0-100    | NOD2    | GCTTTGCTTCTGTGTCTCCTCTCT    | AGGCCAAGACCAGATCAGACT       | 200 |
| Manual_NOD2_e05_a001_0-100    | NOD2    | CTTGTCTTACTAGCTCCATTTTCA    | AGCCCATCACTCACAGCTTC        | 221 |
| Manual_NOD2_e03_a001_0-100    | NOD2    | CCTTCCCACATTGCTCCATC        | TGCCCTTCCCTTTCTGATTAAT      | 205 |
| Manual_IL23R_e10_a004_71-100  | IL23R   | AACTCAGTAGAGGAGGAAACCAC     | TGCAAGGCAGCTTTTCTCATATT     | 238 |
| Manual_IL23R_e10_a003_46-78   | IL23R   | CCACCAGTTGATTCTTAGACT       | TCTGGAATAGTTTCACTGGGTG      | 227 |
| Manual_IL23R_e10_a002_21-54   | IL23R   | GGACCCCTGGAGACAAGAGAC       | ACAGAAAAAGCAAAATTAGGATGC    | 236 |
| Manual_IL23R_e10_a001_0-24    | IL23R   | CCAGTTGGTTCTTTTAAATGTCTTTTG | AGCGAGTTTTGCGGGTAG          | 220 |
| Manual_IL23R_e06_a001_0-100   | IL23R   | CACCACATTTTATTATTGTTACCCA   | agcAGAAAAGATATATAAAGAAAAGCC | 249 |
| Manual_IL23R_e04_a001_0-100   | IL23R   | cctggccAATTAATTCAACTAAATAC  | AGGTCAGCACAACTGGTTATTAT     | 274 |
| Manual_IL23R_e05_a001_0-100   | IL23R   | GGCAAGTTTTAAACAGCCAGGT      | GGCTTTTAAATCATTTCATTACAT    | 246 |
| Manual_IL23R_e02_a002_37-100  | IL23R   | GAACTGCCAACCAAGGAAAC        | TGCCCCAACACTTACATCCA        | 212 |

Supplementary Information for Rivas *et al.*

|                                    |          |                                 |                             |     |
|------------------------------------|----------|---------------------------------|-----------------------------|-----|
| Manual_IL23R_e09_a001_0-100        | IL23R    | CCTAATCTCCTATATGATTGCCTGCT      | AGACTGCACTCTTGGTCTCAAT      | 203 |
| Manual_IL23R_e07_a001_0-100        | IL23R    | GGAAGAACTCCGTTGGGAA             | AAGACTACTCAAAAAGCCTAAGTTGT  | 203 |
| Manual_IL23R_e03_a001_0-100        | IL23R    | ACAGCACCTCCTAAGTGTTATGT         | ACTGGGGTGGAACTGCTTAT        | 202 |
| Manual_IL23R_e01_a001_0-100        | IL23R    | GGGAAAAATGTTATGCTTTTTATTAT      | TGTTGAATGAAAGATAGCAATAGATAC | 213 |
| Manual_PTPN2_e02_a001_0-100        | PTPN2    | CACTGTCAGTTACTAGTGCAGAAGC       | TGCACTTCCTTTCACTTGTTTTTAT   | 289 |
| STAT3_e08_a001_0-100               | STAT3    | TGAGGGAAAGGGACAAGGAT            | TCACTTTGGTAATTAGCATCTTTCTTA | 228 |
| STAT3_e07_a001_0-100               | STAT3    | TTTCATCCTTTACCAGTTTTCTAGC       | AAATGTTTTCTGACTTTGTTTTGG    | 200 |
| CrohnsManual_ZGPAT_e01_a005_86-100 | ZGPAT    | GTGTCCGTGTGCTTTACCTG            | GAAGCTGAGACAAAAGTCAAAG      | 201 |
| CrohnsManual_ZGPAT_e01_a004_67-98  | ZGPAT    | aagagCTGAGTGGGACAAAGGT          | GTTCTCCTTAAAGCGGCACT        | 200 |
| CrohnsManual_ZGPAT_e01_a003_40-72  | ZGPAT    | AAGATGCTGAGTACCAGGCTTTC         | CCAGGAGCTGTAGTAGGGCG        | 203 |
| CrohnsManual_EGR2_e01_a006_49-65   | EGR2     | AGGGTAAAGTTACGGATTGTAGAGAG<br>T | CTACCCACCACCTCCTTCCTATC     | 216 |
| CDKAL1_e12_a002_0-86               | CDKAL1   | GTCAAGTTTTTACATTTTTGTCTTGT      | TGTTCCATTTTTGCAGCAGG        | 201 |
| CDKAL1_e08_a001_0-100              | CDKAL1   | GTGAAGTGTGTAACTCTTGCTAATGT      | TTGAATATTTTTATGAGCAAGTTTGAG | 206 |
| CDKAL1_e06_a001_0-100              | CDKAL1   | GCACTAACAACAGTTTCCAAGAGTAT      | ATTTTCTCTTTTTGCATCAGGT      | 201 |
| CDKAL1_e14_a001_0-100              | CDKAL1   | TCCTTTCTTTCCCTCCCCTT            | ACTCTCCCCTTTAAATGCCCTT      | 201 |
| CDKAL1_e09_a001_0-100              | CDKAL1   | GCACTTTTGTGTATGTTTTGAGGTATC     | TCTTCAGAAAATAAAGAAGTTGGT    | 300 |
| Manual_SLC22A4_e05_a001_0-100      | SLC22A4  | GTATCCAGCCCTGCTGTTGTG           | AGCTGATCTCAAGAGGAAACATCTG   | 216 |
| Manual_SLC22A4_e03_a001_0-100      | SLC22A4  | CACATCTCATGTTTTGTGTTATACTG      | TAGAGGGAAGCACCCCATGT        | 229 |
| Manual_PTPN2_e06_a001_0-100        | PTPN2    | AGTCCACAATTTTCGGGCAAG           | TGGTTTCATGATGTCTATAAACTAAAA | 222 |
| Manual_PTPN2_e09_a001_0-100        | PTPN2    | AAATACACATGCACACAAACCCA         | TACGCTGGCTGGGAAGATAAG       | 200 |
| Manual_PTPN2_e01_a001_0-100        | PTPN2    | CTGTGAGGCAATCTAGAGGGTT          | TCGTCTGTGTGTTTGGTAAATATG    | 201 |
| Manual_IFI30_e01_a001_0-100        | IFI30    | TTAAAGGCGCTTATTTCCCAG           | GAAGTCTGGGGAGAAAGAAGGAG     | 274 |
| Manual_UBE2L3_e04_a001_0-100       | UBE2L3   | GCCACCCTCCTGCTGTAATCT           | TCCATTATGCTTACTTTTCTGTACTT  | 210 |
| Manual_UBE2L3_e02_a001_0-100       | UBE2L3   | GGGCATCAGGAGGGATCTTA            | TCTGGTAGGAAGTGAAGTGTT       | 201 |
| Manual_C13orf31_e04_a002_31-100    | C13orf31 | TATGGCTGCAGTTTGAAGACA           | ATCAAACCTTGCAGTTGAATGAA     | 200 |
| Manual_C13orf31_e04_a001_0-100     | C13orf31 | GGCTCATTTAAAAACCATGATAA         | TGCTGATTCCCTTGAAGAGT        | 297 |

|                                |          |                                 |                             |  |     |
|--------------------------------|----------|---------------------------------|-----------------------------|--|-----|
| 59                             |          |                                 |                             |  |     |
| Manual_C13orf31_e01_a003_47-82 | C13orf31 | GGCTGCCACTTTGTATAACCATTA        | TTCTTGAGCTGTGATTACGTTTAT    |  | 217 |
| Manual_C13orf31_e01_a002_21-57 | C13orf31 | GCCAAGGCCAAGTTTCTCTGTAT         | TGCCTGGGTACAATTACCTTA       |  | 221 |
| Manual_C13orf31_e01_a001_0-30  | C13orf31 | GCAGGTGATTTATTTGGCATAAAAGT<br>A | TTGTTCTCCATCCCTTTTCAT       |  | 212 |
| Manual_TNFSF15_e03_a001_0-100  | TNFSF15  | CTCATCTCTGAACTTCCTGCATAC        | TGCTATGGGAAGCTGTAAGTGTT     |  | 201 |
| Manual_TNFSF15_e02_a001_0-100  | TNFSF15  | CCCATGGTCTCCCGTAAAAC            | AGCTGGAGGAGATCAAGGTTTCT     |  | 201 |
| Manual_ZNF300_e01_a012_89-100  | ZNF300   | CCTGCCTGAAGAGTTTGTCTTG          | TGACTCTTGTGATGACTCTTAAATTGT |  | 221 |
| Manual_ZNF300_e01_a011_81-94   | ZNF300   | GCATCATATTTATGGAATCTCTGTATT     | AGGGATGGTTCATTGTGCTC        |  | 218 |
| Manual_ZNF300_e01_a010_74-86   | ZNF300   | GGCTCACTCTGGCTAGATGATTTT        | AGGCATCAGGGCATAAATATAA      |  | 208 |
| Manual_ZNF300_e01_a009_66-78   | ZNF300   | ACACAGCTTTTCTCTTTAGTTTCC        | ACCGAGTTGTTATAAGAGCAATTCAAG |  | 210 |
| Manual_ZNF300_e01_a008_57-69   | ZNF300   | CAACAAGATGAACTTCTCACTGAA        | TGAAACGTTTTTAGAAATACACAATC  |  | 203 |
| Manual_ZNF300_e01_a007_48-61   | ZNF300   | CCCGCATTCACTACATTCATAGG         | AGAATTCATACTGGAAAGAAACCATA  |  | 213 |
| Manual_ZNF300_e01_a006_40-54   | ZNF300   | GTGGTGTATAATCAGCTGTGACTT        | TCTGAATGTGGAAAAGCCTTC       |  | 219 |
| Manual_ZNF300_e01_a005_32-44   | ZNF300   | CCTCACATTGAGCACATTTGTA          | GGGAAAACCCTATGAATGTAGAGAG   |  | 201 |
| Manual_ZNF300_e01_a004_24-36   | ZNF300   | TGTGTTCTCTGATGTATGATGAGC        | TGTGAGAAGTCCCACCTCATT       |  | 206 |
| Manual_ZNF300_e01_a003_14-27   | ZNF300   | CGGAAGGTGGGACTTCTGAG            | ACCTTATGAATGTAATGTGGAAA     |  | 223 |
| Manual_ZNF300_e01_a002_7-20    | ZNF300   | CCCAGTATGAATCCTCTGATGT          | TGCCAGAAGTCACATCTCATTG      |  | 214 |
| Manual_ZNF300_e01_a001_0-10    | ZNF300   | GCTTGAGCTAATACTAAGGCTTTTCT<br>G | TGTGCTGAATGTGGAAAGGC        |  | 203 |
| Manual_PDLIM4_e07_a001_0-92    | PDLIM4   | GACGCTGTCCTGTCTCGTTC            | GAGTTCACCTTGGCATTGG         |  | 229 |
| Manual_PDLIM4_e03_a001_0-100   | PDLIM4   | TAGGAGACATATCTGACCATCACAAT      | GAGGACATTCAGTGCAGGTG        |  | 210 |

Supplementary Information for Rivas *et al.*

|                               |         |                            |                             |     |
|-------------------------------|---------|----------------------------|-----------------------------|-----|
| Manual_NKX2-3_e02_a004_85-100 | NKX2-3  | TTTGTGAACGTGAGCAACCTA      | CTGAGGAGCTAGACGTACATATTTT   | 248 |
| Manual_NKX2-3_e01_a001_0-56   | NKX2-3  | GGATTTATTATTTGGACTGGACAAT  | CAATTTCTCGCCCTCGTCTT        | 247 |
| Manual_IFI30_e05_a001_0-100   | IFI30   | ATAACGGGGAGGAAGCTGAG       | CTATGAGTGTCAAGCTGAGGGCTA    | 237 |
| Manual_PTPN2_e04_a001_0-100   | PTPN2   | GCAGTTATTTGATGCTATGTGTATTT | TCCTGGGTTCCAATAACAAGA       | 266 |
| Manual_UBE2L3_e01_a001_0-100  | UBE2L3  | GATGCATTCTGGGGAAGGAG       | CTCACATTAACGACGCCCTC        | 387 |
| Manual_ZNF300_e03_a001_0-100  | ZNF300  | GGCACTTGATTGGACAACTCTG     | TCATTTTCAGATTGAACAGGAATTT   | 208 |
| Manual_ZNF300_e02_a001_0-100  | ZNF300  | CCTCAGGCACCAATCAATTA       | TGCAGTCAATCTCAATTCTCTGTG    | 210 |
| Manual_SLC22A5_e09_a002_0-100 | SLC22A5 | ATAAAGGGGTAGATGAGAGACCAAGT | CAGACCCAGTGCATCAACACT       | 247 |
| Manual_SLC22A5_e07_a001_0-100 | SLC22A5 | TTTTCCAGCTTTCTTCTGCAC      | CCCCAAACCATAGATGCACA        | 276 |
| Manual_SLC22A5_e08_a001_0-100 | SLC22A5 | CCTACTCCTACCCTCTTTCCTTT    | GCTCATGGGACTTACCAAGG        | 231 |
| Manual_SLC22A5_e03_a001_0-100 | SLC22A5 | GCTGGTTATCTGTCACTCTCCT     | ATCAAGTACTCAACTCCAACCTG     | 221 |
| Manual_SLC22A5_e10_a001_0-100 | SLC22A5 | CCTCAGTTCTTGTGTTTGGAGA     | TCCTCTTCAGTTTCTCCCTTACT     | 200 |
| Manual_SLC22A5_e06_a001_0-100 | SLC22A5 | GCTCTGAGTCTCTGACCACCTCTT   | AGAAGCTTTGTCTGGAAGCCT       | 200 |
| Manual_SLC22A5_e02_a001_0-100 | SLC22A5 | TTTTAAAAAGAAGTGAATGATACACC | CACGCTTCTTCCTCAGTGCT        | 205 |
| Manual_SLC22A4_e09_a001_0-100 | SLC22A4 | GATTGATGTTCTTATGTCCCG      | AGGCATTTTGGTATCATTTTGTAA    | 205 |
| Manual_ITLN2_e08_a001_0-100   | ITLN2   | AAATCTCTAAACTGAGACCTGAGC   | CTCTCCACAGCTCTCCACATAAA     | 201 |
| Manual_ITLN2_e07_a001_0-100   | ITLN2   | GGAAACTGCAGCTCCTACTCTCA    | TCCATTTGAGGATTCCTGACT       | 200 |
| Manual_ITLN2_e06_a001_0-100   | ITLN2   | GGCTTCAAAGAGAGAATGCTGAGT   | TGGCCTCAGTGGTCAGACTT        | 202 |
| Manual_ITLN2_e03_a001_0-100   | ITLN2   | TTTATGACTGGACTTAGGGAGC     | TGGCAGCATCTCTACTGTCCTC      | 203 |
| Manual_ITLN2_e01_a001_0-100   | ITLN2   | GTTGGAAGATGGGTTCTCGC       | CAAATCAAATTCCTCACAGTGTCTT   | 237 |
| Manual_ITLN1_e06_a001_0-100   | ITLN1   | CTCCCAGAAGACACAATCCTGATA   | TGTCAAACCGGGAATGAGAAT       | 201 |
| Manual_ITLN1_e03_a001_0-100   | ITLN1   | TCCCTTTCCTACCAGGAGTT       | TGTCTTTACTCCATGACTTTTTCTGTG | 200 |
| Manual_IRF1_e02_a001_0-100    | IRF1    | TAAGAAGCCATAAGGATCCAGG     | GAGTTGATAGCCTCTTGCTCTT      | 200 |
| Manual_IRF1_e01_a001_0-100    | IRF1    | TTGCCTAGAGGAATAAGAGGG      | GTAGGGGAAGCACACCTGAT        | 225 |

|                                          |         |                             |                             |     |
|------------------------------------------|---------|-----------------------------|-----------------------------|-----|
| CrohnsManual_IL18RAP_e02_a0<br>02_38-100 | IL18RAP | CTCTCACCAAAACAAGTCCCTGA     | TGGAAATGTTTTCAGATAGAAATGTA  | 250 |
| CrohnsManual_IL18RAP_e10_a0<br>03_57-100 | IL18RAP | ACTTGGAGAGGCTTAAAATCAGT     | TCCAGGGCTCATTTCACCAT        | 202 |
| CrohnsManual_ZGPAT_e06_a00<br>1_0-100    | ZGPAT   | GGGTCTGCATGTTGGAGGAC        | CACGCTTCGTCCATAGTGCT        | 278 |
| CrohnsManual_NCF4_e09_a001<br>_0-83      | NCF4    | CCCTTTGATTATCCCTGACTT       | GTAGTTGTCCTTCTGCGTGATGT     | 204 |
| JAK2_e16_a001_37-100                     | JAK2    | GGGCAGAATTAGCAAACCTTAT      | AGGGCCCAAATGACATCAAG        | 219 |
| JAK2_e01_a001_0-100                      | JAK2    | CTCTTACAGGCAAATGTTCTGA      | TGCATAAAAAGGAAAATGCTGT      | 296 |
| CrohnsManual_IRGM_e01_a002<br>_20-55     | IRGM    | AGTTAACATCACTATGGCAGGG      | GTTCTCCAGGGTTGTGGTGG        | 211 |
| CrohnsManual_IRGM_e01_a001<br>_0-24      | IRGM    | TTTTTGCCACACCATAAGCATT      | ACATCCCATTGCCAGAGTCC        | 479 |
| CrohnsManual_IL18RAP_e02_a0<br>01_0-57   | IL18RAP | GCTAGAATTCCATTTTCTAATGTGTTT | AGGTTGTTGGTACCATTGGACA      | 250 |
| CrohnsManual_NCF4_e08_a002<br>_29-78     | NCF4    | CATCAGCACCATCAAGTCTGT       | GTAAGGAGGCATCAGGCTGG        | 239 |
| CrohnsManual_IL18RAP_e10_a0<br>02_25-69  | IL18RAP | CTACAAGCAGCAGTGAATCTTGC     | AGGCATGTGGTAGCGCATTT        | 201 |
| CrohnsManual_IL18RAP_e10_a0<br>01_0-40   | IL18RAP | TCCATTGCAAATAATCAAATGTT     | TGGCTCTTGGAAGTAACAGAACTTAAT | 209 |
| CrohnsManual_ZNF365_e10_a00<br>2_50-100  | ZNF365  | TCAGATCTGGAAACCACCTCA       | GTTCTGACACTTGAATAGGTCTGG    | 201 |
| CrohnsManual_ZNF365_e10_a00<br>1_0-64    | ZNF365  | TGTTCCCTGTAACTGGGGTT        | GTCACGGTTGCTTCCAGTTG        | 211 |
| CrohnsManual_EGR2_e02_a001<br>_0-100     | EGR2    | AATCCTCTCCTGCGATTCCC        | GAGTTGGGTCTCCAGGTTGTG       | 291 |
| CrohnsManual_ZNF365_e07_a00<br>1_0-100   | ZNF365  | GTGGTTGTATTACCTAGTTATTTTTGC | GCATGACCATGCACATCACTC       | 227 |
| CrohnsManual_IL18RAP_e04_a0<br>02_0-100  | IL18RAP | AAAGTTTTTCTGTGGCAAATTTAT    | TTTGCTGCTCAGATCTCAAAT       | 244 |
| CrohnsManual_IL18RAP_e09_a0<br>02_28-100 | IL18RAP | GGAGCTCTTTTCCAAGTGAGG       | AGACTTGGGGATTGCATTGAAC      | 200 |
| CrohnsManual_IL18RAP_e09_a0<br>01_0-90   | IL18RAP | TGATTCAAGCATATGTATGTGTACC   | TGGAGCCACATCTCTTTCAA        | 250 |
| JAK2_e21_a001_0-100                      | JAK2    | GAGTCCACATATCAAGTAACTGTCTT  | aaaatcaaaCGAACAAACAAAAA     | 220 |

Supplementary Information for Rivas *et al.*

|                               |         |                                 |                             |     |
|-------------------------------|---------|---------------------------------|-----------------------------|-----|
| JAK2_e20_a001_0-100           | JAK2    | GGGAATATATAGGGTTAAGACCATT       | AAGTTTGAAGTCTGTGCTCTAAAAT   | 303 |
| JAK2_e09_a001_0-100           | JAK2    | GTGACTATCCCTCCCTTTCTTTAT        | ATAACAATCCATGACCAGTAATTT    | 277 |
| JAK2_e05_a002_32-88           | JAK2    | ATTCAGCAATTCAGCCAATGC           | TGTTCCCTCTTGACCACTGAAT      | 200 |
| JAK2_e05_a001_0-53            | JAK2    | GTTTTGTTTTCTGTATGTGCTTTT        | AGGCAGACTGCAGAGTTTCCA       | 214 |
| STAT3_e23_a001_0-100          | STAT3   | AAAAATCTGGAACCACAAAGTTAGTA      | CAACTGAACTAGTTTTCCCTGTCT    | 210 |
| STAT3_e22_a001_0-100          | STAT3   | TTATAGGGACAAAGTCTGTCAACC        | CATTGTGTCTTGTCAACCCCC       | 202 |
| STAT3_e21_a001_0-100          | STAT3   | CCCAGGGATAACTGAGGATATTAGA       | TGAGTTTCAAATCAGTCCTGCC      | 203 |
| STAT3_e17_a001_0-100          | STAT3   | CTTCAGGCAGGTCCTACTGG            | ACCCAAGCTGAAAATGTACTACT     | 219 |
| STAT3_e15_a001_0-100          | STAT3   | GGGCACCAACTAAAAGGAGG            | GCGGGTGAAGAGATTTCCAA        | 200 |
| STAT3_e14_a001_0-100          | STAT3   | AATCATTCCACCTTCTCTTGATAA        | tggccTAAGAGTGTCTTCTC        | 211 |
| STAT3_e13_a001_0-100          | STAT3   | ACAGTTGATGTTTCTAATTCTGGG        | GAGAGGGCTAGGGAGAGCCT        | 200 |
| STAT3_e11_a001_0-100          | STAT3   | GGGATCTGAATCACAGGGGA            | AGGTGGTCAAAGTAGGCTTTT       | 204 |
| STAT3_e10_a001_0-100          | STAT3   | AGAGTCTCTAGTTCAAATGATGTCTG<br>T | AGGTTATGGGAGAGTTACTGACTTTTT | 200 |
| STAT3_e05_a001_0-100          | STAT3   | TCAACTCAACAACACAAACTCACTTTC     | TTCTGTTCCCAAGGAAATCTT       | 200 |
| STAT3_e20_a002_33-100         | STAT3   | CCTCCTTGGGAATGTCAGGATA          | ACCTAGCTGTAGGTTCCATGATCT    | 200 |
| STAT3_e19_a001_0-100          | STAT3   | CAACTAGAAGCAGTGATGAGGC          | CAATAACAACATTGTTCCCTCCTCCTT | 240 |
| STAT3_e16_a001_0-100          | STAT3   | GGAGGGAGAAGGGGTGAAAT            | TCCCTCATCTAAACAAGCAAATGT    | 200 |
| JAK2_e14_a001_0-100           | JAK2    | GGACTGATATTTGAATATATGTGCGT<br>T | ACCACTGCCCAAGTAAAGCTTAGTA   | 232 |
| JAK2_e11_a001_0-100           | JAK2    | CGTTCTCCATCTTTACTCATTCTTTT      | TTAAACAGCATAAACTACATGAACAAT | 227 |
| Manual_UBE2L3_e01_a002_0-100  | UBE2L3  | tgGttgtaactgccatctgatt          | GATCCGGAGCCTAGGACG          | 315 |
| Manual_ITLN1_e05_a002_21-100  | ITLN1   | TGTTGTAGTTGGCCCAGTTG            | GAACCCTCAGCTCTCAGACA        | 256 |
| Manual_ITLN1_e05_a001_0-78    | ITLN1   | TCACCCGAGTGGGTAAGAAG            | CTTCTGTGACATGACCTCTGGG      | 232 |
| Manual_ITLN1_e02_a001_0-100   | ITLN1   | CAGCAATGAGCAAGAGAAGGT           | TGAATGCTGTTTTCTGCCTC        | 278 |
| Manual_ATG16L1_e10_a001_0-100 | ATG16L1 | ATGAGAATGACTGGGTTTGACA          | CAAGGGTGCATCATCTCAAGTTT     | 200 |
| Manual_ATG16L1_e07_a001_0-100 | ATG16L1 | CACAGAACTGTTCAAGGAGAATCAA       | TCCACAGATGTGCCTTCATATTG     | 201 |
| Manual_UBE2L3_e05_a001_0-100  | UBE2L3  | CTGAGACTGTGTTAACCCCC            | TCACACTTGCTGGAACCAATC       | 230 |
| Manual_UBE2L3_e03_a001_0-100  | UBE2L3  | TGGTGTGTTTCATTTTGATCTCT         | TCTGGATTCTGTCTGATCTGG       | 314 |

|                                     |          |                                  |                             |     |
|-------------------------------------|----------|----------------------------------|-----------------------------|-----|
| Manual_C13orf31_e02_a002_49-100     | C13orf31 | GTAGTTCCAAACGGAGAGATCC           | AAAAAGCAGATACAAAAGTTAAATAGC | 201 |
| Manual_C13orf31_e02_a001_0-87       | C13orf31 | GGTCTAATTGAGAGACTGGTATTTTGA<br>A | ATTTCTCCACATTAAATCCTGC      | 230 |
| Manual_C13orf31_e03_a001_0-100      | C13orf31 | CCAAAACATTTTTGTTGCACATT          | TGCACAACAAAATGAGTAAAATTC    | 249 |
| Manual_TNFSF15_e01_a002_28-71       | TNFSF15  | TAGATGGGCTGGAACCAGTTG            | CCAGAGTCGGGAGACTACTTC       | 215 |
| Manual_SLC22A4_e01_a002_30-100      | SLC22A4  | TATGTCAGTCGTGTTCTCTGG            | GTATGAACAGCAGGTTTGAGG       | 412 |
| Manual_SLC22A4_e01_a001_0-92        | SLC22A4  | TAGTTGCAAGTTTCGGAGCG             | GTAGACGTCCTGGCTGAACTCC      | 404 |
| Manual_SLC22A4_e08_a001_0-100       | SLC22A4  | GTATCACTTCTAAAAGCACCATTTG        | AGGAAGAACAATGCACAAGA        | 261 |
| Manual_SLC22A4_e07_a002_30-100      | SLC22A4  | GGAGATGCCTACCTGAACTGT            | TGGGTCTTTTCTGGTAAGCTGTT     | 203 |
| Manual_SLC22A4_e07_a001_0-71        | SLC22A4  | CACACCATCCCTTTGTCATTTTAC         | TGCAGCTATGATATAACGCCT       | 201 |
| Manual_SLC22A4_e04_a001_0-100       | SLC22A4  | GTTAATATGCTAATACTCCTCCCTTG       | TGGGGACGAGTCACACTCAC        | 228 |
| Manual_SLC22A4_e10_a001_0-100       | SLC22A4  | GGATGGAGCATTTTGAGGAG             | TCTCCACAGGGTCTTATTTTTCTGT   | 200 |
| Manual_SLC22A4_e06_a001_0-100       | SLC22A4  | CATAGCCAAAGATACTTCCTTACTAC<br>C  | TGTGCTGGATATCTGCATTTTC      | 200 |
| CrohnsManual_ZNF365_e01_a006_84-100 | ZNF365   | GAAAAAGCAGGAAGTTCAGAGAC          | TTGCTTAGCATTTGCTTGTAAGG     | 205 |
| CrohnsManual_ZNF365_e01_a004_49-74  | ZNF365   | AGAGAGGCCTGTGTCCTATGT            | CTTTGGTGAGTTTATCAATTCTCTT   | 200 |
| CrohnsManual_ZNF365_e01_a002_14-38  | ZNF365   | GTGGAGACCATAACCAGATTTAGAAGC      | AGCTCGGTTTCTGCTTTACCA       | 201 |
| CrohnsManual_ZNF365_e01_a001_0-21   | ZNF365   | CTTGTAACCTACCTATTTCCCCC          | TCGTAGCTGTGACTGAACTCC       | 204 |
| CrohnsManual_IRGM_e01_a004_66-100   | IRGM     | GGTTGCATCTGCACAATTCAG            | AATGAAGACAGGAATTAGTATTCACAT | 210 |
| CrohnsManual_IRGM_e01_a003_43-76    | IRGM     | GTGCCTCCTATTTCTCTTCCCAC          | AGAACTTCTTTCCCATGTCCTCA     | 201 |





**Supplementary Table 3. List of 115 nonsynonymous, nonsense, splice-site variants selected for follow-up typing in large case control samples.**

Variants that were successfully designed and typed in follow-up case control samples are above the dashed line. Variants above the dashed line are successfully genotyped across studies.

| chr:position   | alleles | gene     | type   | Aasub     | dbSNP (v132) |
|----------------|---------|----------|--------|-----------|--------------|
| chr11:75931037 | CG      | C11orf30 | ns     | Ala896Gly |              |
| chr13:43353233 | AG      | C13orf31 | ns     | Lys38Glu  | rs34414396   |
| chr1:199144649 | AT      | C1orf106 | ns     | Tyr333Phe | rs41313912   |
| chr1:199145124 | GC      | C1orf106 | ns     | Arg397Thr |              |
| chr9:138379413 | CG      | CARD9    | splice |           | 1            |
| chr9:138382026 | CG      | CARD9    | ns     | Val385Leu | rs3124993    |
| chr9:138384709 | TA      | CARD9    | ns     | Glu270Val | rs114895119  |
| chr6:167469973 | GA      | CCR6     | ns     | Ala89Thr  |              |
| chr6:167470814 | CT      | CCR6     | ns     | Ala369Val | rs17860852   |
| chr10:35354137 | AG      | CUL2     | splice |           | 5            |
| chr10:35362198 | GC      | CUL2     | ns     | Leu338Val |              |
| chr2:27579941  | AC      | GCKR     | ns     | Gln234Pro |              |
| chr2:27599688  | GT      | GCKR     | ns     | Glu586Amb |              |
| chr19:18146896 | CT      | IFI30    | ns     | Pro60Leu  |              |
| chr2:102354958 | CT      | IL18R1   | ns     | Thr139Ile | rs34216045   |
| chr2:102407134 | AG      | IL18RAP  | ns     | Asp136Gly | rs11695455   |
| chr2:102434852 | GT      | IL18RAP  | ns     | Val527Leu |              |
| chr1:67407799  | GA      | IL23R    | ns     | Arg86Gln  | rs76575803   |
| chr1:67421184  | GA      | IL23R    | ns     | Gly149Arg | rs76418789   |
| chr1:67478488  | GA      | IL23R    | ns     | Val362Ile | rs41313262   |
| chr16:84500209 | CT      | IRF8     | ns     | Thr96Met  |              |
| chr16:84509524 | CT      | IRF8     | ns     | Ala201Val |              |
| chr5:150207929 | GC      | IRGM     | ns     | Glu17Asp  |              |
| chr5:150208159 | CA      | IRGM     | ns     | Thr94Lys  | rs72553867   |
| chr1:159181643 | CT      | ITLN2    | ns     | Ala297Thr |              |
| chr1:159189045 | TG      | ITLN2    | ns     | His61Pro  |              |
| chr9:5062561   | GA      | JAK2     | ns     | Gly571Ser |              |
| chr9:5113003   | GT      | JAK2     | splice |           | 1            |
| chr1:199244650 | GA      | KIF21B   | ns     | Ser106Leu |              |
| chr11:76049066 | CT      | LRRC32   | ns     | Ala407Thr | rs79525962   |
| chr11:76049353 | CG      | LRRC32   | ns     | Gly311Ala | rs35130967   |

Supplementary Information for Rivas *et al.*

|                |    |         |        |            |              |
|----------------|----|---------|--------|------------|--------------|
| chr12:38929912 | CG | LRRK2   | ns     | Leu286Val  |              |
| chr12:38994128 | CT | LRRK2   | ns     | Pro1542Ser | rs33958906   |
| chr12:39020469 | GA | LRRK2   | ns     | Gly2019Ser | rs34637584   |
| chr12:39026953 | AG | LRRK2   | ns     | Asn2081Asp | rs33995883   |
| chr19:18102335 | CT | MAST3   | ns     | Arg390Trp  | rs55994961   |
| chr12:39225467 | GA | MUC19   | ns     | Gly36Arg   |              |
| chr12:39226476 | GA | MUC19   | ns     | Val56Met   |              |
| chr12:39229997 | GA | MUC19   | ns     | Ala167Thr  | rs80014625   |
| chr12:39230776 | GC | MUC19   | ns     | Val219Leu  | rs73115384   |
| chr16:49299292 | CT | NOD2    | ns     | Thr189Met  | rs61755182   |
| chr16:49302189 | AG | NOD2    | ns     | Asn289Ser  | rs5743271    |
| chr16:49302254 | CT | NOD2    | ns     | Arg311Trp  | rs104895427  |
| chr16:49302393 | AC | NOD2    | ns     | Asp357Ala  | rs104895469  |
| chr16:49302615 | CT | NOD2    | ns     | Ser431Leu  | rs104895431  |
| chr16:49303373 | CT | NOD2    | ns     | Arg684Trp  | rs5743276    |
| chr16:49303430 | CT | NOD2    | ns     | Arg703Cys  | rs5743277    |
| chr16:49303700 | GA | NOD2    | ns     | Val793Met  | rs104895444  |
| chr16:49308311 | AG | NOD2    | ns     | Asn852Ser  | rs104895467  |
| chr16:49308343 | AG | NOD2    | ns     | Met863Val  | rs104895447  |
| chr16:49314041 | GC | NOD2    | ns     | Gly908Arg  | rs2066845    |
| chr16:49314041 | GC | NOD2    | ns     | Gly908Arg  | rs2066845    |
| chr17:35333045 | GA | ORMDL3  | splice |            | 3            |
| chr5:131573931 | GC | P4HA2   | ns     | Phe218Leu  |              |
| chr5:131635620 | CT | PDLIM4  | ns     | Ala225Val  | rs10479001   |
| chr6:106642946 | GA | PRDM1   | ns     | Gly74Ser   | rs2185379    |
| chr6:106650242 | AG | PRDM1   | ns     | Ile117Met  |              |
| chr6:106659789 | GA | PRDM1   | ns     | Ser220Asn  |              |
| chr6:106659950 | GC | PRDM1   | ns     | Ala274Pro  |              |
| chr6:106660076 | CT | PRDM1   | ns     | Leu316Phe  |              |
| chr6:106661707 | GA | PRDM1   | ns     | Ala577Thr  |              |
| chr5:40727650  | GA | PTGER4  | ns     | Val294Ile  | rs111866313  |
| chr18:12804310 | GT | PTPN2   | ns     | Asn250Lys  |              |
| chr18:12804315 | GT | PTPN2   | ns     | Leu249Met  |              |
| chr1:114182437 | GT | PTPN22  | ns     | His370Asn  | rs72650671   |
| chr1:114196212 | CT | PTPN22  | ns     | Arg263Gln  | rs33996649   |
| chr1:114203227 | TC | PTPN22  | splice |            | 4 rs72650669 |
| chr5:131685803 | GA | SLC22A4 | ns     | Arg227His  |              |
| chr5:131757267 | GT | SLC22A5 | ns     | Gly484Val  | rs28383480   |
| chr5:131757279 | GA | SLC22A5 | ns     | Arg488His  | rs28383481   |
| chr2:230751117 | CT | SP110   | ns     | Gly483Arg  |              |

|                |    |          |        |            |             |
|----------------|----|----------|--------|------------|-------------|
| chr2:230785927 | CT | SP110    | ns     | Gly126Ser  | rs41309088  |
| chr2:230882885 | GA | SP140    | ns     | Met687Ile  |             |
| chr1:171422483 | CT | TNFSF4   | ns     | Ser116Asn  |             |
| chr9:116706178 | AC | TNFSF8   | ns     | Tyr187Asp  |             |
| chr20:61837700 | GT | ZGPAT    | ns     | Lys507Asn  |             |
| chr10:63818322 | GA | ZNF365   | ns     | Arg302His  |             |
| chr2:233829561 | CA | ATG16L1  | ns     | Pro64Thr   |             |
| chr2:233838333 | GT | ATG16L1  | ns     | Arg149Leu  |             |
| chr1:199145060 | CT | C1orf106 | ns     | Arg376Cys  |             |
| chr1:199147649 | CT | C1orf106 | ns     | Arg554Cys  | rs61745433  |
| chr6:21339191  | CG | CDKAL1   | ns     | Ser561Cys  |             |
| chr10:64244198 | CT | EGR2     | ns     | Arg69Lys   |             |
| chr19:18147146 | AG | IFI30    | ns     | Glu114Gly  | rs76227216  |
| chr2:102367893 | AG | IL18R1   | splice |            | 3           |
| chr1:67445177  | CT | IL23R    | splice |            | 4           |
| chr1:67457857  | GT | IL23R    | ns     | Asp271Tyr  |             |
| chr5:131850401 | GC | IRF1     | ns     | Ser133Arg  |             |
| chr16:84509646 | TC | IRF8     | ns     | Tyr242His  |             |
| chr5:150208020 | AG | IRGM     | ns     | Thr48Ala   |             |
| chr1:159118484 | CT | ITLN1    | ns     | Asp98Asn   |             |
| chr9:5060023   | CA | JAK2     | ns     | His538Asn  |             |
| chr9:5071730   | GT | JAK2     | ns     | Glu814Ocr  |             |
| chr11:76048907 | CA | LRRRC32  | ns     | Ala460Ser  |             |
| chr12:39031792 | AG | LRRK2    | ns     | Tyr2189Cys | rs35658131  |
| chr22:35603714 | GA | NCF4     | ns     | Arg308Gln  |             |
| chr16:49303695 | GA | NOD2     | ns     | Arg791Gln  | rs104895464 |
| chr18:12804331 | GT | PTPN2    | ns     | Asn243Lys  |             |
| chr18:12820943 | GT | PTPN2    | ns     | Ser120Amb  |             |
| chr5:131757779 | GT | SLC22A5  | ns     | Met530Ile  |             |
| chr2:230744672 | GA | SP110    | ns     | Thr624Met  |             |
| chr17:37744273 | GT | STAT3    | splice |            | 2           |
| chr17:37744300 | GT | STAT3    | ns     | Asn175Lys  |             |
| chr17:37744353 | GT | STAT3    | ns     | Leu158Ile  |             |
| chr8:126517797 | GA | TRIB1    | ns     | Val341Ile  |             |
| chr22:20305819 | TC | UBE2L3   | ns     | Ile109Thr  |             |
| chr20:61810863 | GC | ZGPAT    | ns     | Ala163Pro  |             |
| chr5:150255792 | CG | ZNF300   | ns     | Arg401Thr  |             |
| chr5:150255916 | TC | ZNF300   | ns     | Lys360Glu  |             |
| chr5:150256176 | GT | ZNF300   | ns     | Thr273Lys  |             |
| chr5:150256395 | AG | ZNF300   | ns     | Leu200Pro  |             |

Supplementary Information for Rivas *et al.*

|                |    |        |        |           |   |
|----------------|----|--------|--------|-----------|---|
| chr5:150257885 | GT | ZNF300 | ns     | Pro66Gln  |   |
| chr10:63806049 | TC | ZNF365 | ns     | Cys31Arg  |   |
| chr10:63806482 | CA | ZNF365 | ns     | Thr175Asn |   |
| chr10:63828504 | GT | ZNF365 | splice |           | 1 |

### Supplementary Table 4. Identification of independent rare risk and protective variants associated with IBD.

We identify IVS11+1G>C to be protective against IBD with an estimated odds ratio of 0.29 strong (4-fold) protective effect. 5 independent rare mutations in *NOD2* are identified to be associated with Crohn's Disease including R311W, R703C, S431L + V793M, N852S, M863V + fs1007insC. Additional variants conferring protection to IBD are identified in *IL23R*, and *CUL2* and risk missense variants in *IL18RAP*, *C1orf106*, *MUC19*, and *PTPN22*.

| CD versus UC + HC (CD loci)       |                | Sequencing Based Counts |                |          | Targeted Replication (CD, UC + HC)   |          | International ImmunoChip (CD, UC + HC) |    | Combined (CD, UC + HC)            |  |
|-----------------------------------|----------------|-------------------------|----------------|----------|--------------------------------------|----------|----------------------------------------|----|-----------------------------------|--|
| Gene, Mutation                    | chr:position   | Case Counts             | Control Counts | Observed | Expected (CD AF, UC + HC AF)         | Observed | Expected (CD AF, UC + HC AF)           | OR | (L95, U95)                        |  |
| <i>NOD2</i> , p.M863V+ fs1007insC | chr16:49308343 | 6                       | 1              | 107      | (7969,10179)<br>69.34 (.0067,.00157) | 47       | (6544,16126)<br>25.53 (.0036,.0011)    |    | (14523,26305)<br>4.02 (2.8,5.07)  |  |
|                                   |                |                         |                |          | <b>6.73E-11</b>                      |          | <b>2.15E-07</b>                        |    | <b>&lt;1e-16</b>                  |  |
| <i>NOD2</i> , p.N852S             | chr16:49308311 | 5                       | 0              | 73       | (7962,9590)<br>54.12 (.0046,.0021)   | 14       | (6542,16121)<br>9.28 (.001,.000465)    |    | (14504,25711)<br>2.47 (1.55,3.93) |  |
|                                   |                |                         |                |          | <b>0.00017</b>                       |          | <b>0.0338</b>                          |    | <b>2.90E-05</b>                   |  |
| <i>NOD2</i> , p.R703C             | chr16:49303430 | 7                       | 6              | 66       | (3090,4100)<br>47.88 (.011,.0054)    | 133      | (8416,17183)<br>103.12 (.0079,.0052)   |    | (11506,21283)<br>1.51 (1.12,2.03) |  |
|                                   |                |                         |                |          | <b>0.00025</b>                       |          | <b>1.59E-04</b>                        |    | <b>2.33E-07</b>                   |  |
| <i>NOD2</i> , p.S431L             | chr16:49302615 | 3                       | 5              | 62       | (7949,9569)<br>87 (.0039,.0019)      | 50       | (6545,16124)<br>39.52 (.0038,.0026)    |    | (14494,25693)<br>1.45 (1.07,1.95) |  |
|                                   |                |                         |                |          | <b>0.0014</b>                        |          | <b>0.023</b>                           |    | <b>0.00025</b>                    |  |
| <i>NOD2</i> , p.V793M             | chr16:49303700 | 4                       | 4              | 15       | (2227,3252)<br>10.11 (.00337,.0015)  | 56       | (6949,16156)<br>43.86 (.004,.0026)     |    | (9176,19408)<br>1.45 (1.07,1.95)  |  |
|                                   |                |                         |                |          | <b>0.0217</b>                        |          | <b>0.0127</b>                          |    | <b>0.002</b>                      |  |
| <i>NOD2</i> , p.R311W             | chr16:49302254 | 3                       | 1              | 10       | (3010,5506)<br>7.49 (.0017,.00099)   | 20       | (6950,16149)<br>14.14 (.0014,.00073)   |    | (9960,21654)<br>2.28 (1.37,3.79)  |  |
|                                   |                |                         |                |          | <b>0.118</b>                         |          | <b>0.029</b>                           |    | <b>0.00143</b>                    |  |
| <i>IL18RAP</i> , p.V527L          | chr2:102434852 | 4                       | 2              | 57       | (7920,9561)<br>41.94 (.0036,.0015)   | 2        | (4131,10336)<br>0.9 (.00025,0)         |    | (12051,19897)<br>3.03 (1.95,4.73) |  |
|                                   |                |                         |                |          | <b>0.0006</b>                        |          | <b>0.0456</b>                          |    | <b>2.90E-04</b>                   |  |
| <i>MUC19</i> , p.V56M             | chr12:39226476 | 3                       | 2              | 13       | (2227,3253)<br>8.79 (.0029,.00138)   | 3        | (4963,11324)<br>0.95 (.0003,.00004)    |    | (7190,14577)<br>4.32 (1.93,9.67)  |  |
|                                   |                |                         |                |          | <b>0.033</b>                         |          | <b>0.11</b>                            |    | <b>0.00546</b>                    |  |

  

| IBD versus HC (CD + UC loci) |                | Sequencing Based Counts |                |          | Targeted Replication (IBD, HC)      |          | International ImmunoChip (IBD, HC)    |    | Combined (IBD, HC)                |  |
|------------------------------|----------------|-------------------------|----------------|----------|-------------------------------------|----------|---------------------------------------|----|-----------------------------------|--|
| Gene, Mutation               | chr:position   | Case Counts             | Control Counts | Observed | Expected (IBD AF, HC AF)            | Observed | Expected (IBD AF, HC AF)              | OR | (L95, U95)                        |  |
| <i>CARD9</i> , p.IVS11+1C>G  | chr9:138379413 | 0                       | 6              | 42       | (10439,5933)<br>69.3 (.002,.0058)   | 78       | (16420,10707)<br>137.11 (.0024,.0071) |    | (26859,16640)<br>0.29 (0.22,0.37) |  |
|                              |                |                         |                |          | <b>1.90E-08</b>                     |          | <b>3.33E-16</b>                       |    | <b>&lt;1e-16</b>                  |  |
| <i>IL23R</i> , p.V362I       | chr1:67478488  | 9                       | 12             | 140      | (5321,6112)<br>143.56 (.0131,.0127) | 271      | (12241,10426)<br>319.05 (.011,.0152)  |    | (17562,16538)<br>0.72 (0.63,0.83) |  |
|                              |                |                         |                |          | <b>0.27</b>                         |          | <b>2.70E-05</b>                       |    | <b>1.18E-05</b>                   |  |
| <i>IL23R</i> , p.G149R       | chr1:67421184  | 2                       | 1              | 24       | (4629,5305)<br>29.28 (.0026,.0045)  | 69       | (13789,10707)<br>87.89 (.0025,.0043)  |    | (18418,16012)<br>0.6 (0.45,0.79)  |  |
|                              |                |                         |                |          | <b>0.064</b>                        |          | <b>0.0013</b>                         |    | <b>3.20E-04</b>                   |  |
| <i>CUL2</i> , p.IVS17+ 5A>G  | chr10:35354137 | 4                       | 4              | 63       | (5582,1684)<br>65.8 (.0056,.0063)   | 213      | (16387,10707)<br>245.88 (.0065,.0092) |    | (21969,12391)<br>0.72 (0.60,0.86) |  |
|                              |                |                         |                |          | <b>0.2</b>                          |          | <b>0.0004</b>                         |    | <b>3.45E-04</b>                   |  |
| <i>PTPN22</i> , p.H370N      | chr1:114182437 | 12                      | 6              | 33       | (5583,1682)<br>31.6 (.003,.002)     | 101      | (21997,12393)<br>85.9 (.0031,.002)    |    | (21997,12393)<br>1.6 (1.16,2.24)  |  |
|                              |                |                         |                |          | <b>0.3</b>                          |          | <b>0.0046</b>                         |    | <b>6.20E-03</b>                   |  |
| <i>C1orf106</i> , p.Y333F    | chr1:19914464  | 12                      | 6              | 333      | (13991,8486)<br>150.72 (.013,.01)   | -        | NA                                    |    | (13991,8486)<br>1.44 (1.02,2.06)  |  |
|                              |                |                         |                |          | <b>0.009</b>                        |          | <b>NA</b>                             |    | <b>0.009</b>                      |  |

**Supplementary Table 5. Conditional analysis of NOD2 variants.**

Conditional analysis and haplotype based test demonstrates independent contributions from R703C and R311W (A subset of all genotyped samples were used for the conditional analysis – as not all samples had both variants typed).

| <b>Conditional Analysis NOD2 (p.R311W,p.R703C)</b> |           |             |              |           |            |            |             |          |  |
|----------------------------------------------------|-----------|-------------|--------------|-----------|------------|------------|-------------|----------|--|
| <b>SNP</b>                                         | <b>A1</b> | <b>TEST</b> | <b>NMISS</b> | <b>OR</b> | <b>L95</b> | <b>U95</b> | <b>STAT</b> | <b>P</b> |  |
| p.R311W                                            | A         | ADD         | 33563        | 2.115     | 1.35       | 3.314      | 3.269       | 0.001078 |  |
| p.R703C                                            | A         | p.R703C     | 33563        | 1.433     | 1.177      | 1.744      | 3.585       | 3.37E-04 |  |

**Supplementary Table 6. Conditional analysis for rare variants in IL18RAP and MUC19.**

Conditional analysis for rare variants in IL18RAP and MUC19 demonstrate independent contributions from GWAS associated common variant (A subset of all genotyped samples were used for the conditional analysis – as not all samples had both variants typed).

| <b>Conditional Analysis MUC19 (rs11564258,p.V56M)</b> |           |             |              |           |            |            |             |          |  |
|-------------------------------------------------------|-----------|-------------|--------------|-----------|------------|------------|-------------|----------|--|
| <b>SNP</b>                                            | <b>A1</b> | <b>TEST</b> | <b>NMISS</b> | <b>OR</b> | <b>L95</b> | <b>U95</b> | <b>STAT</b> | <b>P</b> |  |
| p.V56M                                                | A         | ADD         | 23528        | 3.008     | 1.337      | 6.769      | 2.662       | 0.007769 |  |
| rs11564258                                            | A         | rs11564258  | 23528        | 1.486     | 1.325      | 1.666      | 6.759       | 1.39E-11 |  |

| <b>Conditional Analysis IL18RAP (rs2058660,p.V527L)</b> |           |             |              |           |            |            |             |          |  |
|---------------------------------------------------------|-----------|-------------|--------------|-----------|------------|------------|-------------|----------|--|
| <b>SNP</b>                                              | <b>A1</b> | <b>TEST</b> | <b>NMISS</b> | <b>OR</b> | <b>L95</b> | <b>U95</b> | <b>STAT</b> | <b>P</b> |  |
| p.V527L                                                 | A         | ADD         | 23521        | 11.51     | 1.374      | 96.44      | 2.253       | 0.02426  |  |
| rs2058660                                               | A         | rs2058660   | 23521        | 1.486     | 1.066      | 1.166      | 4.741       | 2.13E-06 |  |

**Supplementary Table 7. Additive genetic variance explained.**

(Estimate) denotes without M863V included in the calculation.

| Variant             | % Additive Genetic Variance Explained |                    | RR   |
|---------------------|---------------------------------------|--------------------|------|
|                     | All Samples                           | AJ                 |      |
| NOD2, M863V         | 0.370                                 | 0.759              | 4.02 |
| NOD2, N852S         | 0.160                                 | 0.553              | 2.47 |
| NOD2, S431L + V793M | 0.016                                 | 0.009              | 1.5  |
| NOD2, R703C Only    | 0.040                                 | 0.051              | 1.61 |
| NOD2, R311W Only    | 0.004                                 | 0.000              | 1.82 |
| NOD2, R703C + R311W | 0.028                                 | 0.000              | 2.7  |
| CARD9, IVS11+1C>G   | 0.320                                 | 0.158              | 3.48 |
| IL18RAP,V527L       | 0.147                                 | 0.130              | 2.79 |
| PTPN22,H370N        | 0.016                                 | 0.000              | 1.6  |
| MUC19,V56M          | 0.167                                 | 1.413              | 4.32 |
| C1orf106,Y333F      | 0.043                                 | 0.043              | 1.44 |
| CUL2, IVS17+5A>G    | 0.018                                 | 0.000              | 1.39 |
| IL23R,V362I         | 0.028                                 | 0.000              | 1.34 |
| IL23R,G149R         | 0.036                                 | 0.000              | 1.68 |
| <b>TOTAL</b>        | <b>1.39 (1.02)</b>                    | <b>3.12 (2.36)</b> |      |



## Supplementary Figures

### Supplementary Figure 1. Coverage summary and power to detect variants.

(a) 1500X median coverage per pool, corresponding to an average of 30X per samples (15X per individual chromosome) was achieved for the CD pooled sequencing experiments. Power to detect a singleton is approximately greater than or equal to 60% in greater than 80% of all targeted genomic positions for the (b) CD experiment.

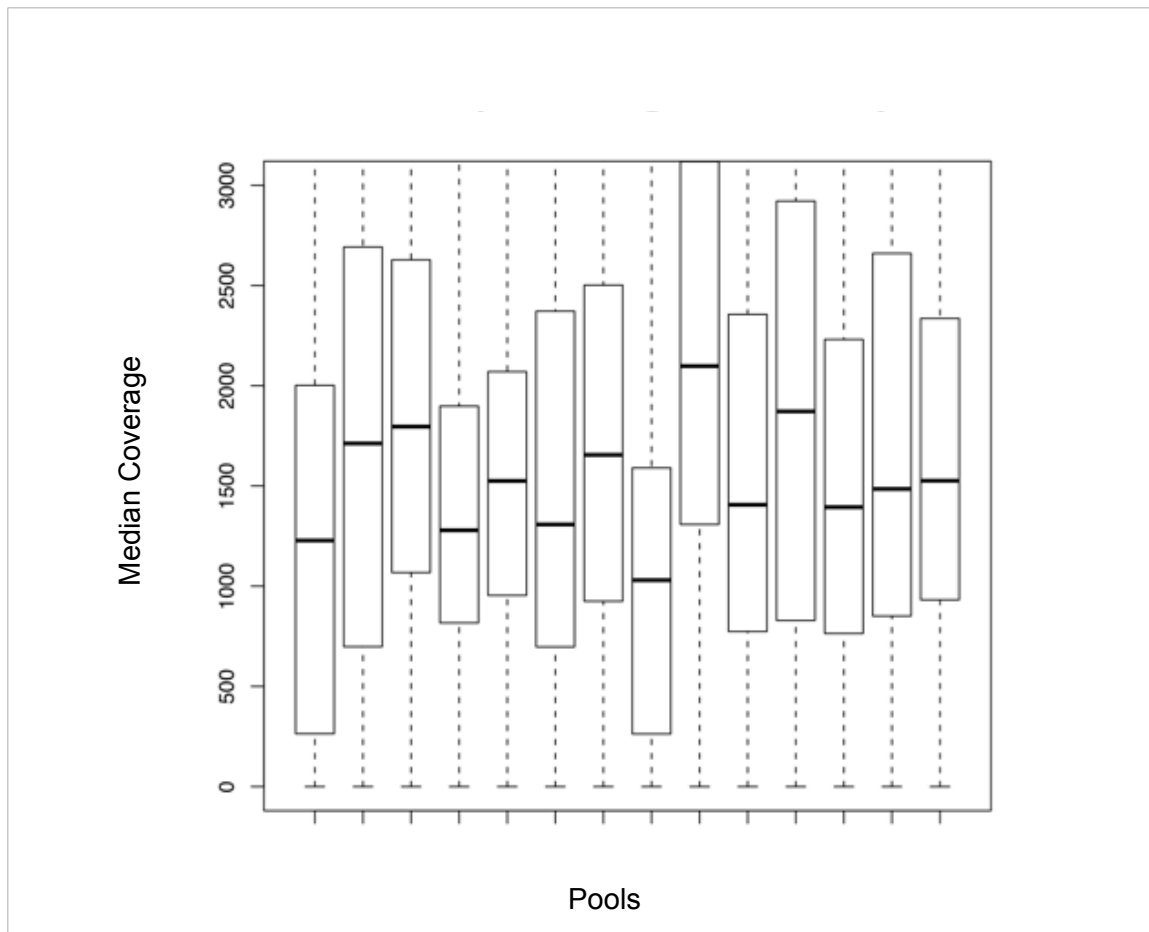

(a)

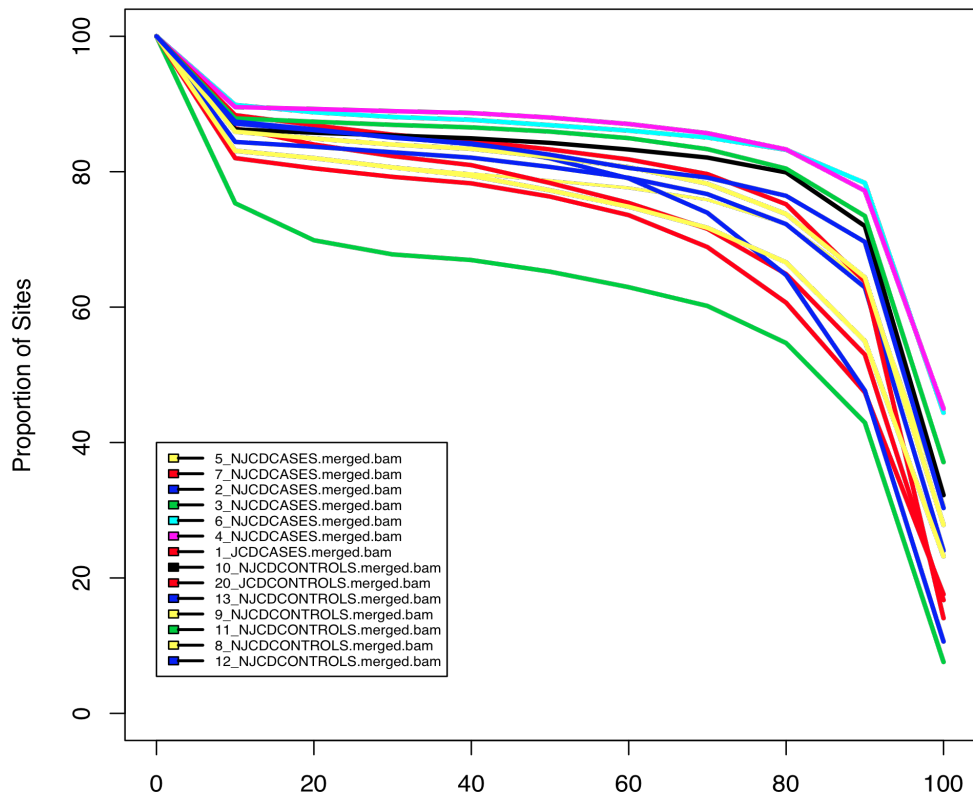

(b)

**Supplementary Figure 2. Pooled sequence allele frequency and genotyped allele frequency correlation.**

We observe high correlation between pooled sequencing estimated frequencies and genotype estimated frequencies.

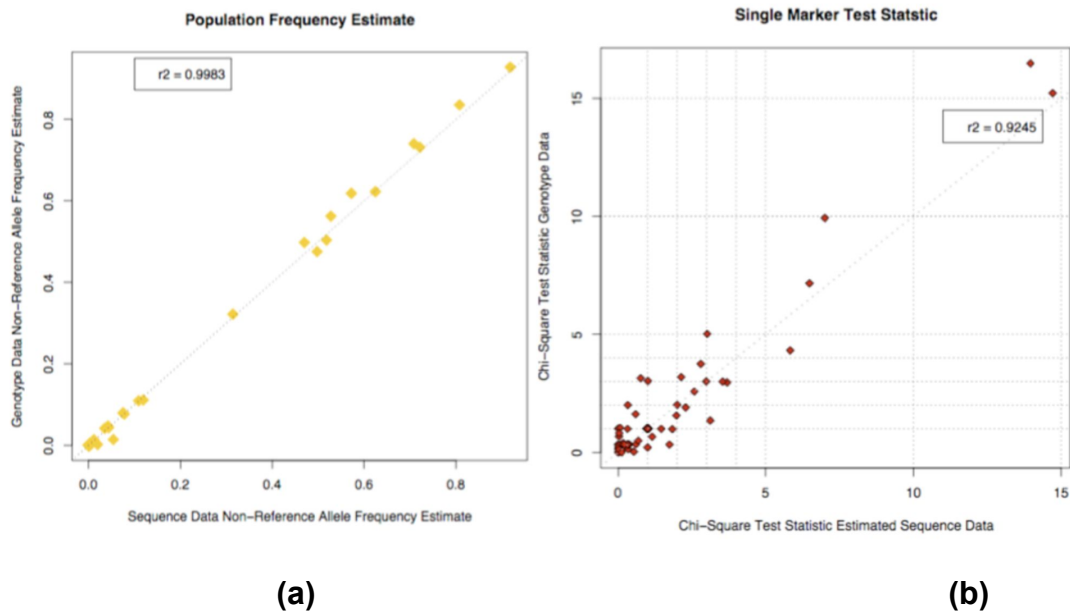

**Supplementary Figure 3. Allele frequency distribution and study-wide power.**

(a) The allele frequency distribution estimated in a combined dataset of 13167 CD disease patients, 12153 UC disease patients, and 15331 healthy controls for the 70 variants tested for association to IBD in follow up genotyping. (b) Experimental-wide power (P value  $\leq .007$ , solid-line) and nominal power (P value  $\leq .01$ , dashed line) to detect association at varying odds ratio and allele frequencies (percentage). In red diamonds we overlay the variants that are highlighted in the manuscript. (c) Required number of samples to reach experimental-wide significance for minor allele frequency range [.0005-.005] at varying odds ratio.

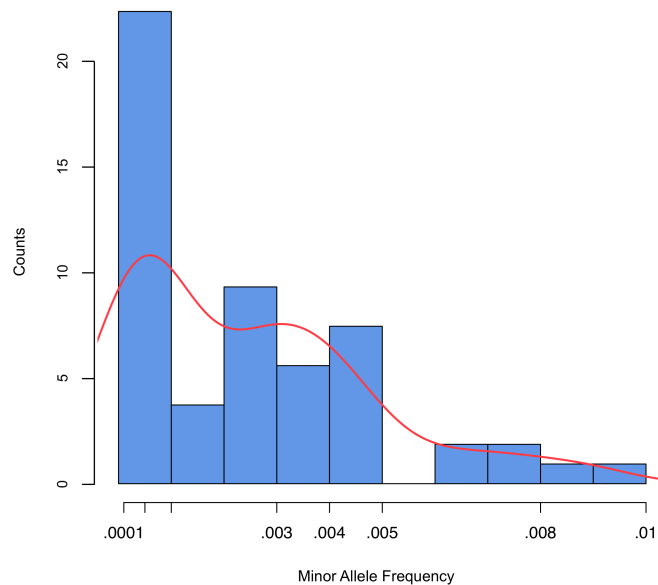

**(a)**

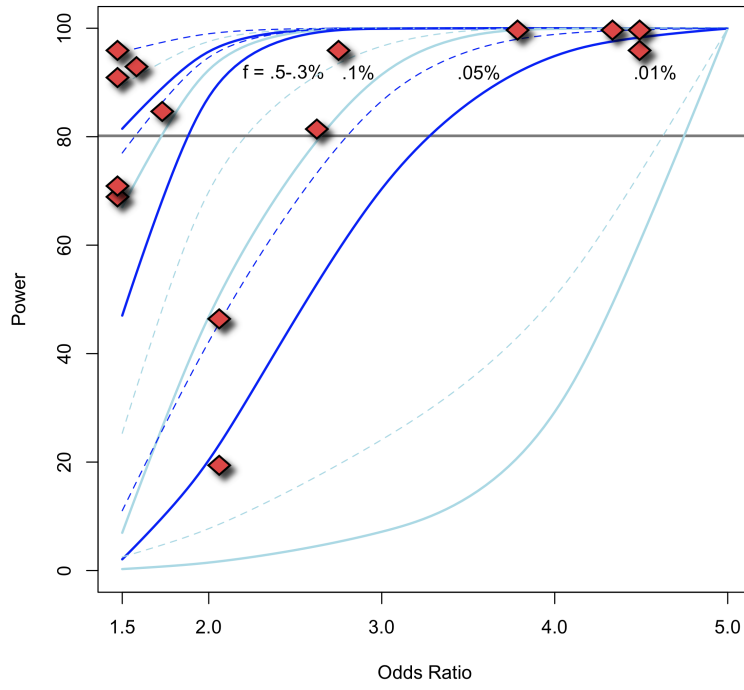

(b)

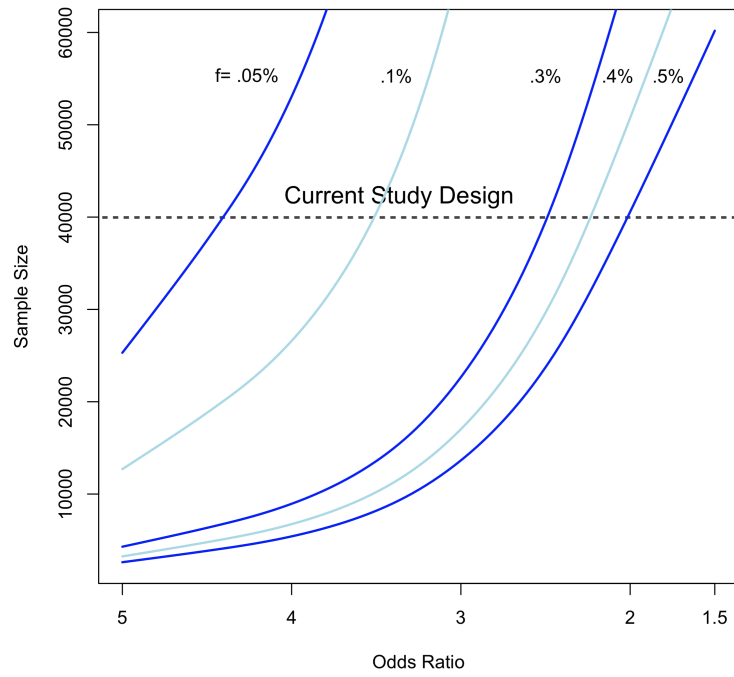

(c)

**Supplementary Figure 4. CARD9 reference protein and predicted splicing.**

CARD9 reference protein including exons 10, 11, 12, and 13 and predicted truncated CARD9 protein after exon-skipping due to IVS11+1G>C.

|                                                                                                                                                                                                                                                                                                                                                                                                                                                                                                                                                                                                                                                                                                                                                                                                                                                                                                                         |                                                                                                                                                                                                                                                                                                                  |
|-------------------------------------------------------------------------------------------------------------------------------------------------------------------------------------------------------------------------------------------------------------------------------------------------------------------------------------------------------------------------------------------------------------------------------------------------------------------------------------------------------------------------------------------------------------------------------------------------------------------------------------------------------------------------------------------------------------------------------------------------------------------------------------------------------------------------------------------------------------------------------------------------------------------------|------------------------------------------------------------------------------------------------------------------------------------------------------------------------------------------------------------------------------------------------------------------------------------------------------------------|
| <p><b>Exon 10</b></p> <p>TCA GAC AAA GGC TGC CTT GCC GGC GGG GGG<br/>Ser Asp Lys Gly Cys Leu Ala Gly Gly Gly</p> <p>AGC CCG AAA CAG CCC TTT GCA GCT CTG CAC<br/>Ser Pro Lys Gln Pro Phe Ala Ala Leu His</p> <p><b>Exon 12</b></p> <p>CAG GAG CAG GTT TTG CGG AAC CCC CAT GAC<br/>Gln Glu Gln Val Leu Arg Asn Pro His Asp</p> <p>GCA GGC CTG AGC AGC GGG GAG CCG CCC GAG<br/>Ala Gly Leu Ser Ser Gly Glu Pro Pro Glu</p> <p>AAG GAG CGG CGG CGC CTC AAA GAG AGT TTT<br/>Lys Glu Arg Arg Arg Leu Lys Glu Ser Phe</p> <p><b>Exon 13</b></p> <p>GAG AAC TAC CGC AGG AAG CGC GCC CTC AGG<br/>Glu Asn Tyr Arg Arg Lys Arg Ala Leu Arg</p> <p>AAG ATG CAG AAA GGA TGG CGG CAG GGG GAG<br/>Lys Met Gln Lys Gly Trp Arg Gln Gly Glu</p> <p>GAG GAC CGG GAG AAC ACC ACG GGC AGC GAC<br/>Glu Asp Arg Glu Asn Thr Thr Gly Ser Asp</p> <p>AAC ACC GAC ACT GAG GGC TCC TAG <b>536</b><br/>Asn Thr Asp Thr Glu Gly Ser <b>STOP</b></p> | <p><b>Exon 10</b>      <b>Exon 12</b></p> <p><b>450</b> TCA GAC AAA GGA CGC AGG CCT GAG CAG CGG<br/>Ser Asp Lys Gly Arg Arg Pro Glu Gln Arg</p> <p>GGA GCC GCC CGA GAA GGA GCG GCG GCG CCT<br/>Gly Ala Ala Arg Glu Gly Ala Ala Ala Pro</p> <p>CAA AGA GAG TTT TGA <b>473</b><br/>Gln Arg Glu Phe <b>STOP</b></p> |
|-------------------------------------------------------------------------------------------------------------------------------------------------------------------------------------------------------------------------------------------------------------------------------------------------------------------------------------------------------------------------------------------------------------------------------------------------------------------------------------------------------------------------------------------------------------------------------------------------------------------------------------------------------------------------------------------------------------------------------------------------------------------------------------------------------------------------------------------------------------------------------------------------------------------------|------------------------------------------------------------------------------------------------------------------------------------------------------------------------------------------------------------------------------------------------------------------------------------------------------------------|

**Supplementary Figure 5. Shared extended haplotypes of Ashkenazi Jews with *NOD2* *p.N852S* and *p.M863V* mutation.**

*N852S* and *M863V* are observed at higher frequencies in Ashkenazi Jews compared to non-Jewish disease patients with European ancestry (4%,2%,.5%,.5%) with a 4Mb extended shared segments. Homozygote individual for *p.N852S* (labeled 1) has at least a 2 Mb shared segment.

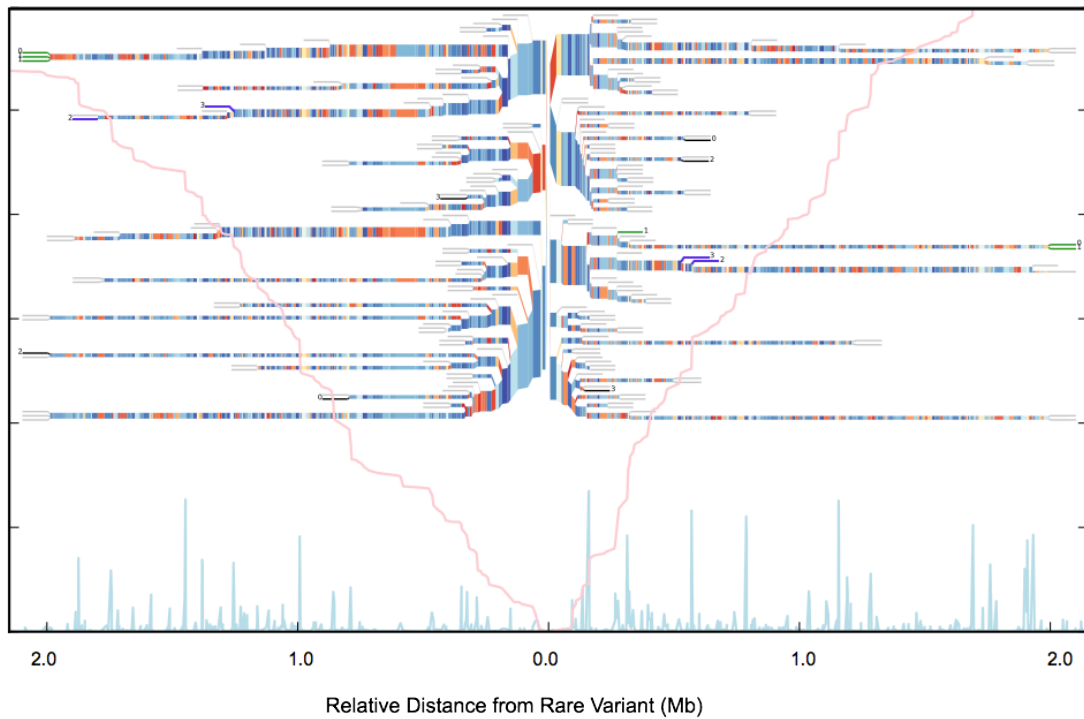



**Supplementary Figure 6. LD structure of associated rare variants and common associated GWAS variant.**

Haplotype Structure demonstrates that rare variant and common GWAS associated variant in *CUL2*, *PTPN22*, and *C1orf106* are in linkage equilibrium, whereas in *MUC19* and *IL18RAP* they are not. Conditional Analysis (Table S4) demonstrates an independent and an additional contributing effect from the rare variants in *IL18RAP* and *MUC19*.

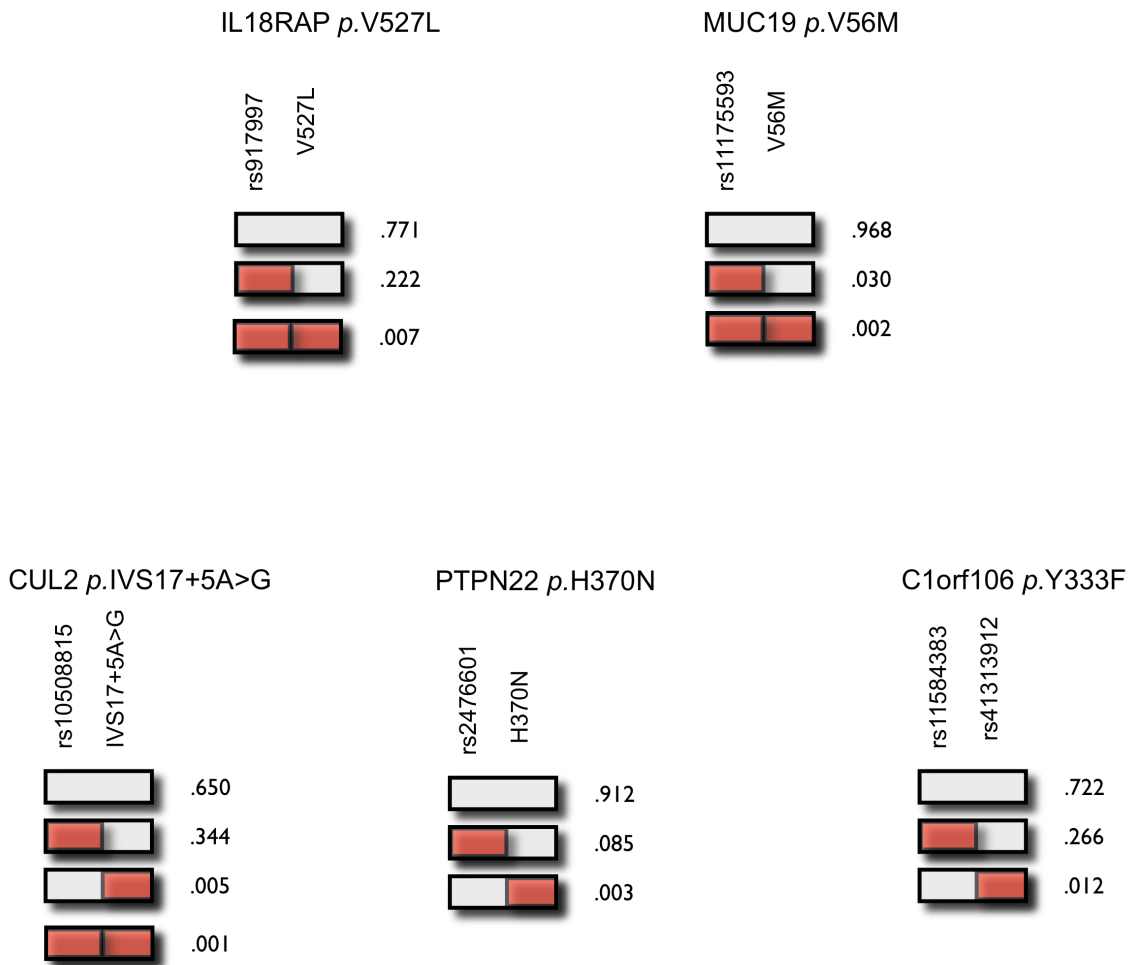

## Supplementary Figure 7. Null simulations for M.A.R.V.

Distribution of quantiles under the null hypothesis of no disease association under three different scenarios: a) MAF = .003; b) MAF = .005; c) MAF = .01. 1,000 simulations under the null demonstrates properly calibrated test statistic values. Simulations done with 20,000 cases versus 20,000 controls with 10 stratas of 2,000 cases versus 2,000 matched controls.

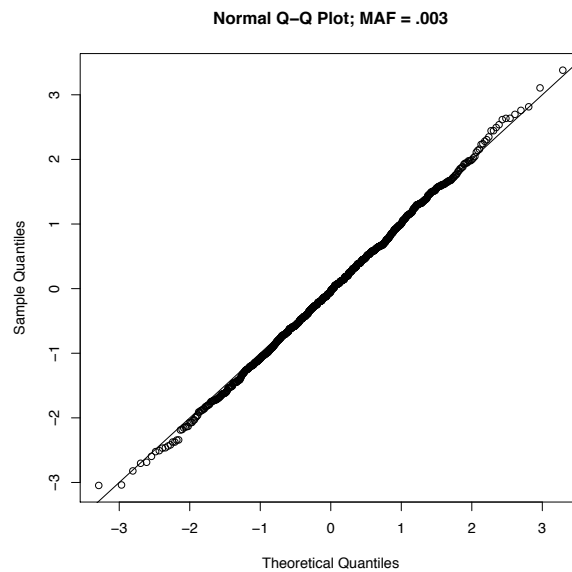

(a)

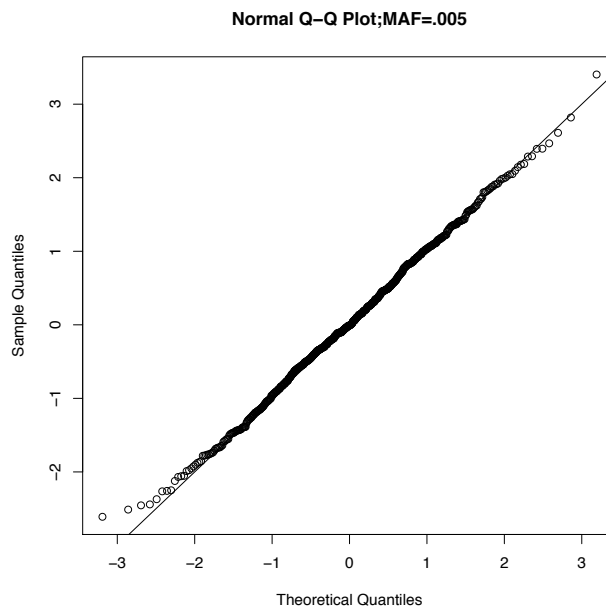

(b)

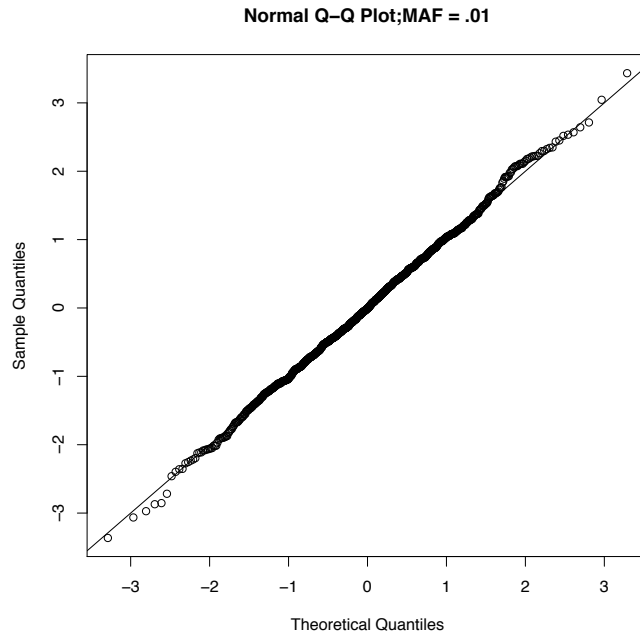

(c)

## Consortium Authors

The Principal Investigators of the NIDDK IBDGC are: Steven R Brant<sup>1</sup>, Judy H Cho<sup>2,3</sup>, Richard H Duerr<sup>4</sup>, Dermot P B McGovern<sup>5</sup>, John D Rioux<sup>6</sup>, Mark S Silverberg<sup>7</sup>

<sup>1</sup> Johns Hopkins University School of Medicine, Department of Medicine, and Johns Hopkins University Bloomberg School of Public Health, Department of Epidemiology, Baltimore, Maryland, USA.

<sup>2</sup> Department of Medicine, Yale University, New Haven, Connecticut, USA.

<sup>3</sup> Department of Genetics, Yale University, New Haven, Connecticut, USA.

<sup>4</sup> Division of Gastroenterology, Hepatology and Nutrition, Department of Medicine, University of Pittsburgh School of Medicine, and Department of Human Genetics, Graduate School of Public Health, University of Pittsburgh, Pittsburgh, Pennsylvania, USA.

<sup>5</sup> Inflammatory Bowel and Immunobiology Research Institute, Cedars-Sinai Medical Center, Los Angeles, California, USA.

<sup>6</sup> Université de Montréal and the Montreal Heart Institute, Research Center, Montréal, Québec, Canada.

<sup>7</sup> Mount Sinai Hospital Inflammatory Bowel Disease Group, University of Toronto, Toronto, Ontario, Canada.

### The International Inflammatory Bowel Disease Genetics Consortium

consists of the following people: Tariq Ahmad<sup>6</sup>, Carl A. Anderson<sup>3</sup>, Vito Annese<sup>15,64</sup>, Robert N. Baldassano<sup>20</sup>, Tobias Balschun<sup>8</sup>, Murray Barclay<sup>10</sup>, Jeffrey C. Barrett<sup>3</sup>, Theodore M. Bayless<sup>21</sup>, Joshua C. Bis<sup>11</sup>, Stephan Brand<sup>22</sup>, Steven R. Brant<sup>21</sup>, Suzanne Bumpstead<sup>3</sup>, Carsten Buning<sup>23</sup>, Judy H. Cho<sup>19,63</sup>, Albert Cohen<sup>24</sup>, Jean-Frederick Colombel<sup>25</sup>, Mario Cottone<sup>26</sup>, Mauro D'Amato<sup>57</sup>, Renata D'Inca<sup>29</sup>, Mark J. Daly<sup>65</sup>, Ted Denson<sup>27</sup>, Marla Dubinsky<sup>30</sup>, Richard H. Duerr<sup>47,61</sup>, Cathryn Edwards<sup>31</sup>, David Ellinghaus<sup>1</sup>, Tim Florin<sup>32</sup>, Denis Franchimont<sup>33</sup>, Andre Franke<sup>1</sup>, Richard Geary<sup>10</sup>, Michel Georges<sup>13</sup>, Jurgen Glas<sup>22,34,35</sup>, Gossum33 Andre Van Gossum<sup>33</sup>, Anne M. Griffiths<sup>55</sup>, Stephen L. Guthery<sup>36</sup>, Hakon Hakonarson<sup>4,20</sup>, Talin Haritunians<sup>14</sup>, Jean-Pierre Hugot<sup>39</sup>, Dirk J de Jong<sup>66</sup>, Luke Jostins<sup>3</sup>, Subra Kugathasan<sup>59</sup>, Gerd Kullak-Ublick<sup>54</sup>, Anna Latiano<sup>15</sup>, Debby Laukens<sup>28</sup>, Ian Lawrance<sup>40</sup>, James Lee<sup>9</sup>, Charlie W. Lees<sup>7</sup>, Marc Lemann<sup>41</sup>, Arie Levine<sup>42</sup>, Cecile Libioulle<sup>43</sup>, Edouard Louis<sup>43</sup>, John C. Mansfield<sup>60</sup>, Christopher G. Mathew<sup>16</sup>, Dermot P.B. McGovern<sup>2,14</sup>, Mitja Mitrovic<sup>12,67</sup>, Grant W. Montgomery<sup>17</sup>, Craig Mowat<sup>44</sup>, William Newman<sup>45</sup>, Orazio Palmieri<sup>15</sup>, Julián Panés<sup>46</sup>, Miles Parkes<sup>9</sup>, Anne Phillips<sup>44</sup>, C.Y. Ponsioen<sup>52</sup>, Uros Potočnik<sup>67</sup>, Natalie J. Prescott<sup>16</sup>, Deborah D. Proctor<sup>19</sup>, Graham L. Radford-Smith<sup>5</sup>, Miguel Regueiro<sup>47</sup>, John D. Rioux<sup>56</sup>, Rebecca Roberts<sup>10</sup>, Jerome I. Rotter<sup>14</sup>, Paul Rutgeerts<sup>48</sup>, Jeremy Sanderson<sup>49</sup>, Miquel Sans<sup>46</sup>, Jack Satsangi<sup>7</sup>, Stefan Schreiber<sup>1,62</sup>, Philip Schumm<sup>18</sup>, Frank Seibold<sup>50</sup>, Yashoda Sharma<sup>19</sup>, Mark S. Silverberg<sup>51</sup>, Lisa A. Simms<sup>5</sup>, A. Hillary Steinhart<sup>51</sup>, Stephan R. Targan<sup>2</sup>, Kent

D. Taylor<sup>14</sup>, Leif Torkvist<sup>53</sup>, Severine Vermeire<sup>48</sup>, Jonas Halfvarson<sup>37</sup>, H.W. Verspaget<sup>138</sup>, Martine De Vos<sup>28</sup>, Thomas Walters<sup>55</sup>, Kai Wang<sup>4</sup>, Rinse K. Weersma<sup>58</sup>, David Whiteman<sup>17</sup>, Cisca Wijmenga<sup>12</sup>

<sup>1</sup> Institute of Clinical Molecular Biology, Christian-Albrechts-University Kiel, Schittenhelmstr. 12, D-24105 Kiel, Germany

<sup>2</sup> Inflammatory Bowel and Immunobiology Research Institute, Cedars-Sinai Medical Center, Los Angeles, California, USA.

<sup>3</sup> Wellcome Trust Sanger Institute, Wellcome Trust Genome Campus, Hinxton, Cambridge, UK

<sup>4</sup> Center for Applied Genomics, The Children's Hospital of Philadelphia, Philadelphia, PA 19104, USA

<sup>5</sup> Inflammatory Bowel Disease Research Group, Queensland Institute of Medical Research, Brisbane, Australia.

<sup>6</sup> Peninsula College of Medicine and Dentistry, Barrack Road, Exeter, UK

<sup>7</sup> Gastrointestinal Unit, Molecular Medicine Centre, University of Edinburgh, Western General Hospital, Crewe Road, Edinburgh, UK

<sup>8</sup> popgen Biobank, Christian-Albrechts University Kiel, D-24105 Kiel, Germany

<sup>9</sup> Gastroenterology Research Unit, Addenbrooke's Hospital, University of Cambridge, Cambridge, UK

<sup>10</sup> Department of Medicine, University of Otago, Christchurch 8140, New Zealand

<sup>11</sup> Cardiovascular Health Research Unit, Department of Medicine, University of Washington, Seattle, USA

<sup>12</sup> Department of Genetics, University Medical Center Groningen, Groningen, the Netherlands

<sup>13</sup> Department of Genetics, Faculty of Veterinary Medicine, University of Liège B43, 20 Bd de Colonster, 4000 Liège, Belgium

<sup>14</sup> Medical Genetics Institute, Cedars-Sinai Medical Center, Los Angeles, California, USA

<sup>15</sup> Unit of Gastroenterology, IRCCS-CSS Hospital, San Giovanni Rotondo, Italy

<sup>16</sup> Department of Medical and Molecular Genetics, King's College London School of Medicine, Floor 8 Tower Wing, Guy's Hospital, London, UK

<sup>17</sup> Molecular Epidemiology, Queensland Institute of Medical Research, Brisbane, Australia 4006

<sup>18</sup> Department of Health Studies, University of Chicago, Chicago, Illinois, USA

<sup>19</sup> Section of Digestive Diseases, Department of Medicine, Yale University, New Haven, Connecticut, USA

<sup>20</sup> Department of Pediatrics, Center for Pediatric Inflammatory Bowel Disease, The Children's Hospital of Philadelphia, Philadelphia, USA

<sup>21</sup> Inflammatory Bowel Disease Center, Dept. of Medicine, Johns Hopkins University School of Medicine, Baltimore, Maryland, U.S.A

<sup>22</sup> Department of Medicine II, University Hospital MunichGrosshadern, Ludwig-Maximilians-University, Munich, Germany

<sup>23</sup> Department of Gastroenterology, Charité, Campus Mitte, Universitätsmedizin Berlin, Berlin, Germany

<sup>24</sup> Montreal Jewish General Hospital, Montréal, Québec, Canada

- <sup>25</sup> Registre EPIMAD, Université de Lille, Lille, France
- <sup>26</sup> Unit of Gastroenterology, Cervello Hospital, Palermo, Italy
- <sup>27</sup> Pediatric Gastroenterology, Cincinnati Children's Hospital. Medical Center. 3333 Burnet Ave, Cincinnati, USA
- <sup>28</sup> Department of Hepatology and Gastroenterology, Ghent University Hospital, Ghent, Belgium
- <sup>29</sup> Division of Gastroenterology, University Hospital Padua, Italy
- <sup>30</sup> Department of Pediatrics, Cedars Sinai Medical Center, Los Angeles, CA, USA
- <sup>31</sup> Torbay Hospital, Torbay, Devon, UK
- <sup>32</sup> Department of Gastroenterology, Mater Health Services, Brisbane, Australia 4101
- <sup>33</sup> Department of Gastroenterology, Erasmus Hospital, Free University of Brussels, Brussels, Belgium
- <sup>34</sup> Department of Preventive Dentistry and Periodontology, Ludwig-Maximilians-University, Munich, Germany
- <sup>35</sup> Department of Human Genetics, RWTH Aachen, Germany
- <sup>36</sup> Department of Pediatrics, University of Utah School of Medicine, Salt Lake City, UT, USA
- <sup>37</sup> Department of Medicine, Örebro University Hospital, Örebro, Sweden
- <sup>38</sup> Dept of Gastroenterology, Leiden University Medical Center, Leiden, The Netherlands
- <sup>39</sup> Université Paris Diderot, Paris, France
- <sup>40</sup> School of Medicine and Pharmacology, The University of Western Australia, Fremantle, Australia 6160
- <sup>41</sup> GETAID group, Université Paris Diderot, Paris, France
- <sup>42</sup> Pediatric Gastroenterology Unit, Wolfson Medical Center and Sackler School of Medicine, Tel Aviv University, Israel
- <sup>43</sup> Division of Gastroenterology, CHU, Université de Liège, Liège, Belgium
- International IBD Genetics Consortium – Meta-analysis for Crohn's disease v2
- <sup>44</sup> Dept of Medicine, Ninewells Hospital and Medical School, Dundee, UK
- <sup>45</sup> Department of Medical Genetics, University of Manchester, Manchester, UK
- <sup>46</sup> Department of Gastroenterology, Hospital Clínic/IDIBAPS. CIBER EHD. Barcelona, Spain
- <sup>47</sup> Division of Gastroenterology, Hepatology and Nutrition, School of Medicine, University of Pittsburgh, Pittsburgh, Pennsylvania, USA
- <sup>48</sup> Division of Gastroenterology, University Hospital Gasthuisberg, Leuven, Belgium
- <sup>49</sup> Dept Gastroenterology, Guy's & St Thomas' NHS Foundation Trust, St Thomas' Hospital, London, UK
- <sup>50</sup> Division of Gastroenterology, Inselspital, University of Bern, Bern, Switzerland
- <sup>51</sup> Mount Sinai Hospital Inflammatory Bowel Disease Centre, University of Toronto, Canada
- <sup>52</sup> Department of Gastroenterology, Academic Medical Center, Amsterdam, the Netherlands
- <sup>53</sup> Department of Clinical Science Intervention and Technology, Karolinska Institutet, Stockholm, Sweden

<sup>54</sup> Division of Clinical Pharmacology and Toxicology University Hospital Zurich, CH-8091 Zurich, Switzerland

<sup>55</sup> The Hospital for Sick Children, University of Toronto, Ontario, Canada

<sup>56</sup> Université de Montréal and the Montreal Heart Institute, Research Center, Montréal, Québec, Canada

<sup>57</sup> Department of Biosciences and Nutrition, Karolinska Institute, Stockholm, Sweden

<sup>58</sup> Department of Gastroenterology, University Medical Center Groningen, Groningen, The Netherlands

<sup>59</sup> Department of Pediatrics; Emory University School of Medicine, Atlanta, GA, USA

<sup>60</sup> Institute of Human Genetics, Newcastle University, Newcastle upon Tyne, UK

<sup>61</sup> Department of Human Genetics, Graduate School of Public Health, University of Pittsburgh, Pittsburgh, Pennsylvania, USA

<sup>62</sup> Department for General Internal Medicine, Christian-Albrechts-University, Schittenhelmstr. 12, D-24105 Kiel, Germany

<sup>63</sup> Department of Genetics, Yale School of Medicine, New Haven CT, USA

<sup>64</sup> Unit of Gastroenterology, University Hospital Careggi Florence, Italy

<sup>65</sup> Center for Human Genetic Research, Massachusetts General Hospital, Harvard Medical School, Boston, Massachusetts, USA

<sup>66</sup> Department of Gastroenterology and Hepatology, Radboud University Medical Center Nijmegen, the Netherlands

<sup>67</sup> University of Maribor, Faculty of Medicine, Center for human molecular genetics and pharmacogenomics, Slomskov trg 15, 2000 Maribor
