# Supplementary material
Source: PubMed Central journal article supplement (PMC3378381)

Figure 3

a

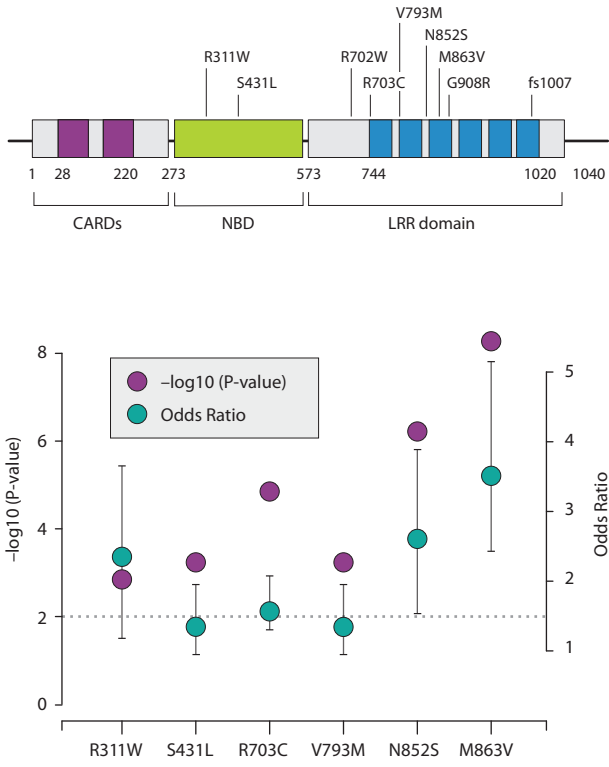

b

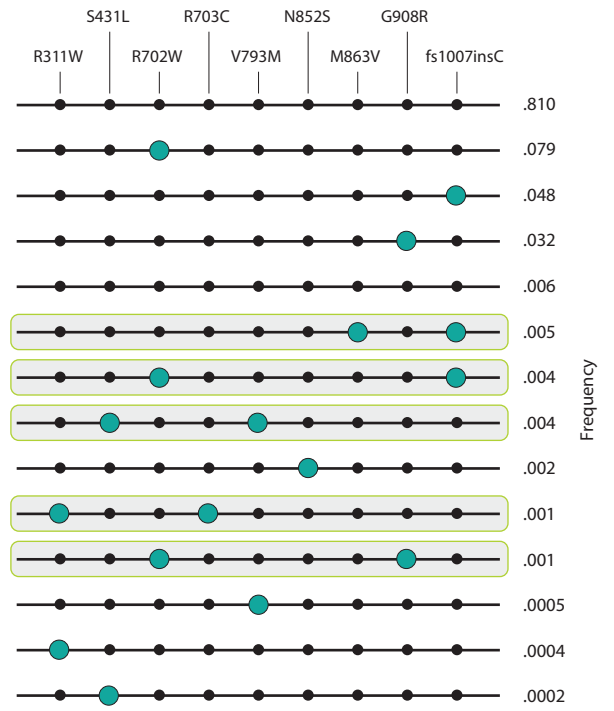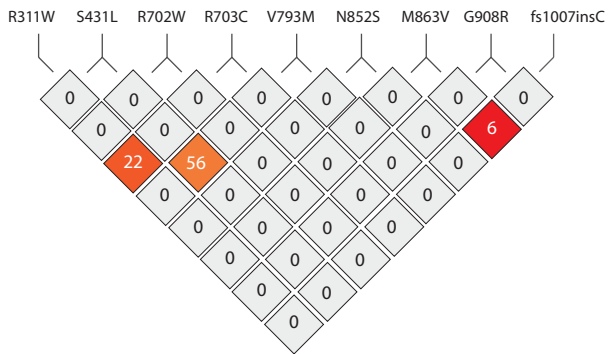

Supplement: NIHMS335188-supplement-3.pdf [file NIHMS335188-supplement-3.pdf]

Figure 4

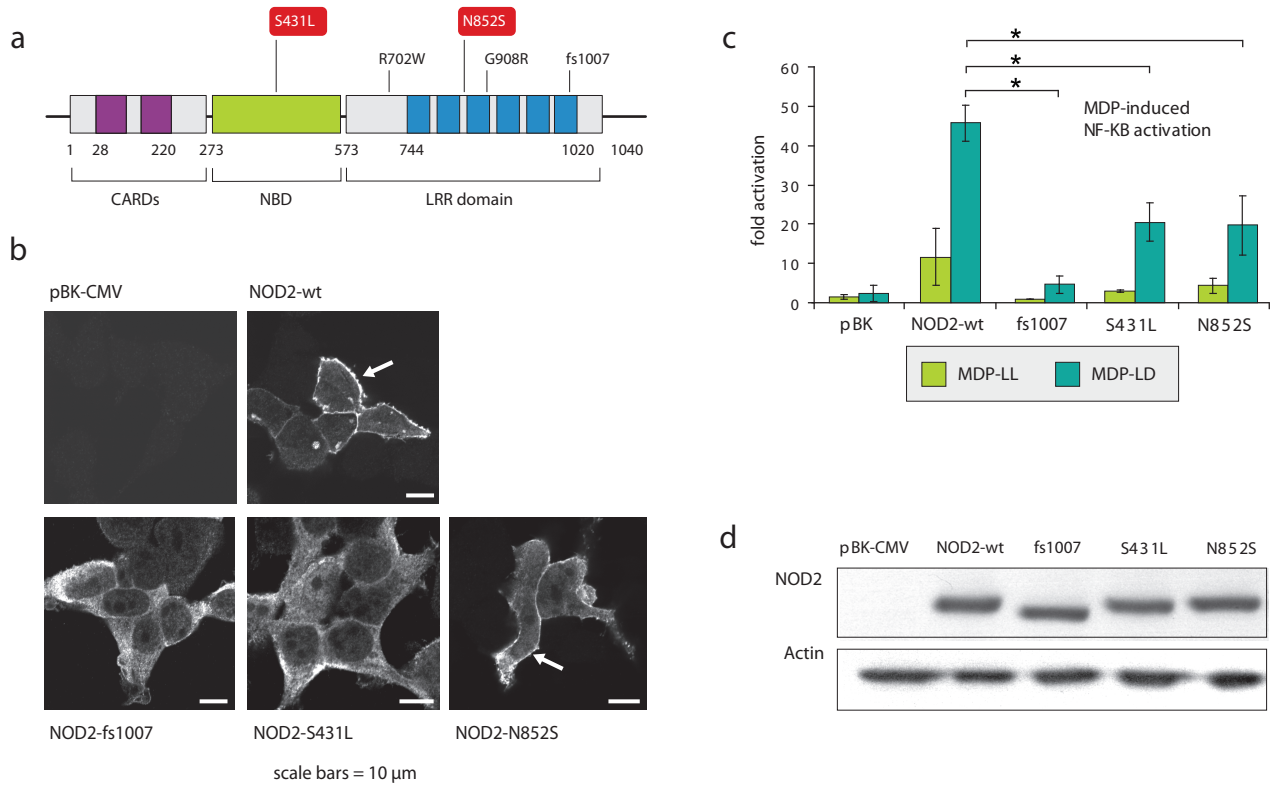

Supplement: NIHMS335188-supplement-4.pdf [file NIHMS335188-supplement-4.pdf]
